# Supplementary material
Source: publisher site journal article supplement (https://www.dovepress.com/article/520039)
Supplement: Supplementary file 1 [file Supplementary%20Materials_1.pdf]

**Supplementary Figure 1.** Construction of WGCNA modules. (A) Sample dendrogram showing normal control and AS classification. (B) Scale independence and mean connectivity under various soft-thresholding powers. (C) Co-expression modules assigned diverse colors for each gene in the hierarchical clustering tree. Dynamic tree cut represents the original modules, while merged dynamic corresponds to the finally identified merged modules. (D) Heatmap illustrating relationships between co-expression modules and clinical traits. Numbers indicate correlation coefficients, with p-values in parentheses. (E) KEGG enrichment analysis of genes in the turquoise module. (F) GO enrichment analysis of genes in the turquoise module.

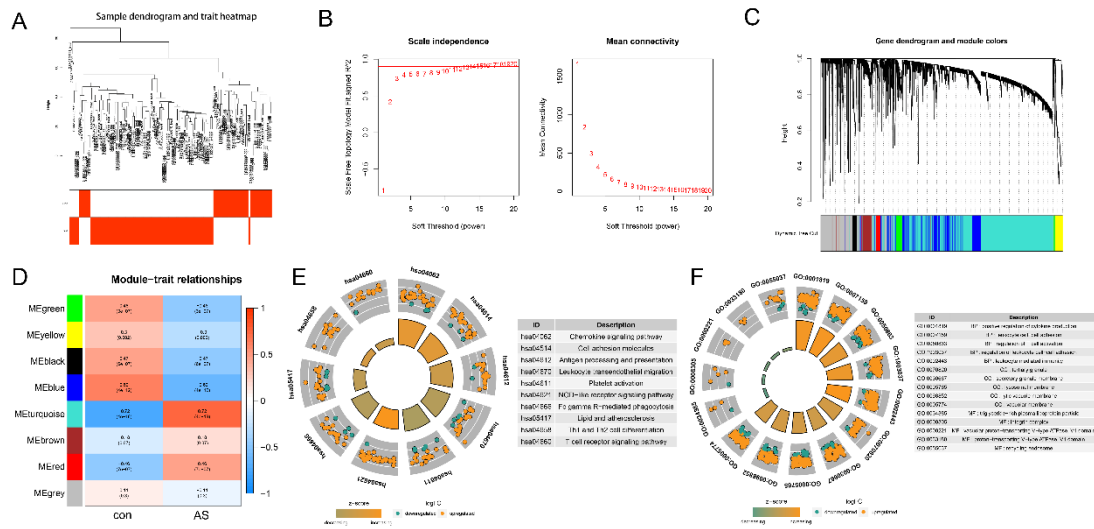

**Supplementary Figure 2.** Functional enrichment analysis and protein network interaction of LCDEGs. (A, B) Sankey-bubble diagram showing the GO and KEGG enrichment analysis of LCDEGs. (C) Network interaction among LCDEGs. (D) Association of LCDEGs with predicted related genes.

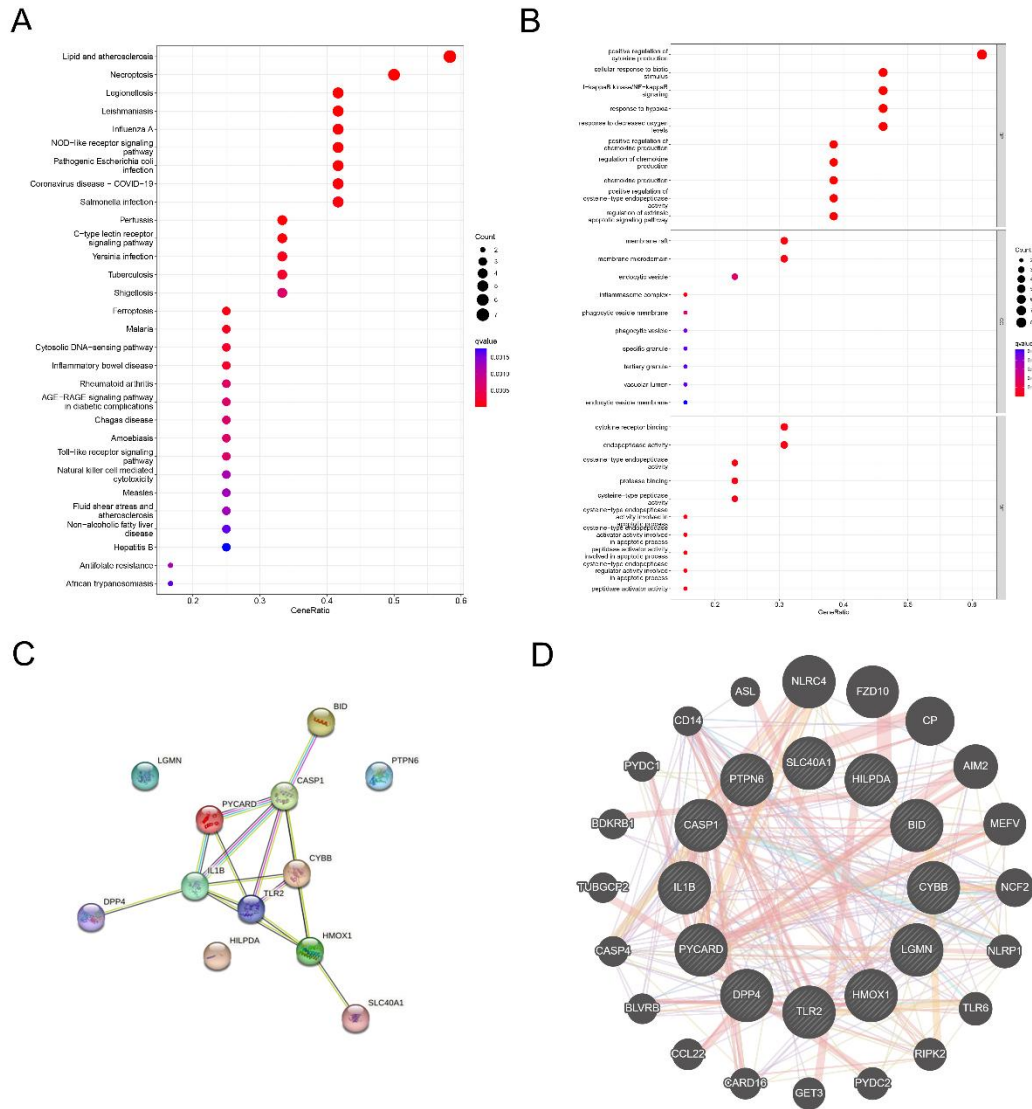

**Supplementary Figure 3.** External validation (GSE43292) to further test the diagnostic performance of AS signature genes. (A-H) Differences in the expression of AS signature genes between different groups. (I-P) The ROC curves of the AS signature genes. \* indicates  $P < 0.05$  compared to cluster A, \*\* indicates  $P < 0.01$  compared to cluster A, and \*\*\* indicates  $P < 0.001$  compared to cluster A.

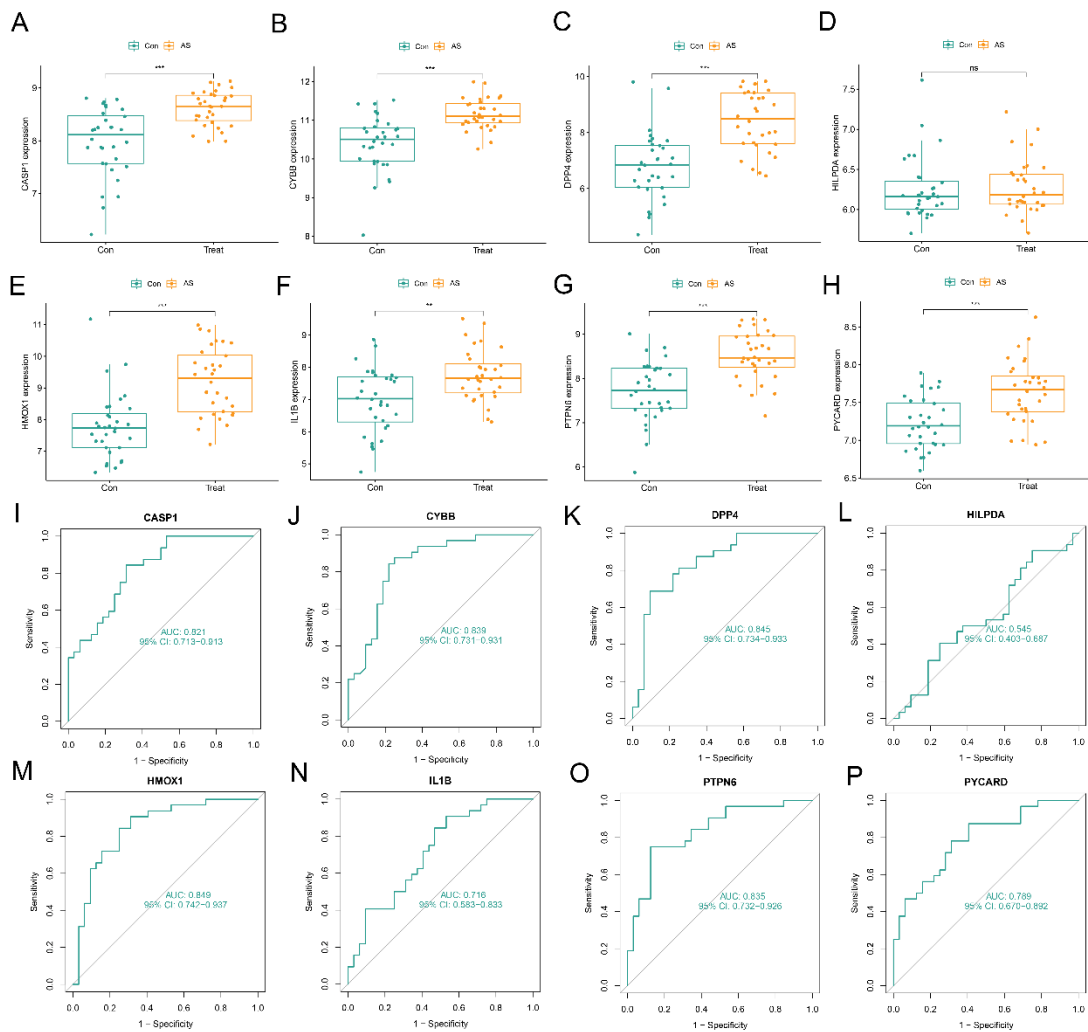

**Supplementary Figure 4.** External validation (GSE28829) to further test the diagnostic performance of ANN model and AS signature genes. (A) Differences in the expression of AS signature genes between different groups. (B) The ROC curves of the ANN model. (C-J) The ROC curves of the AS signature genes. \* indicates  $P < 0.05$  compared to cluster A, \*\* indicates  $P < 0.01$  compared to cluster A, and \*\*\* indicates  $P < 0.001$  compared to cluster A.

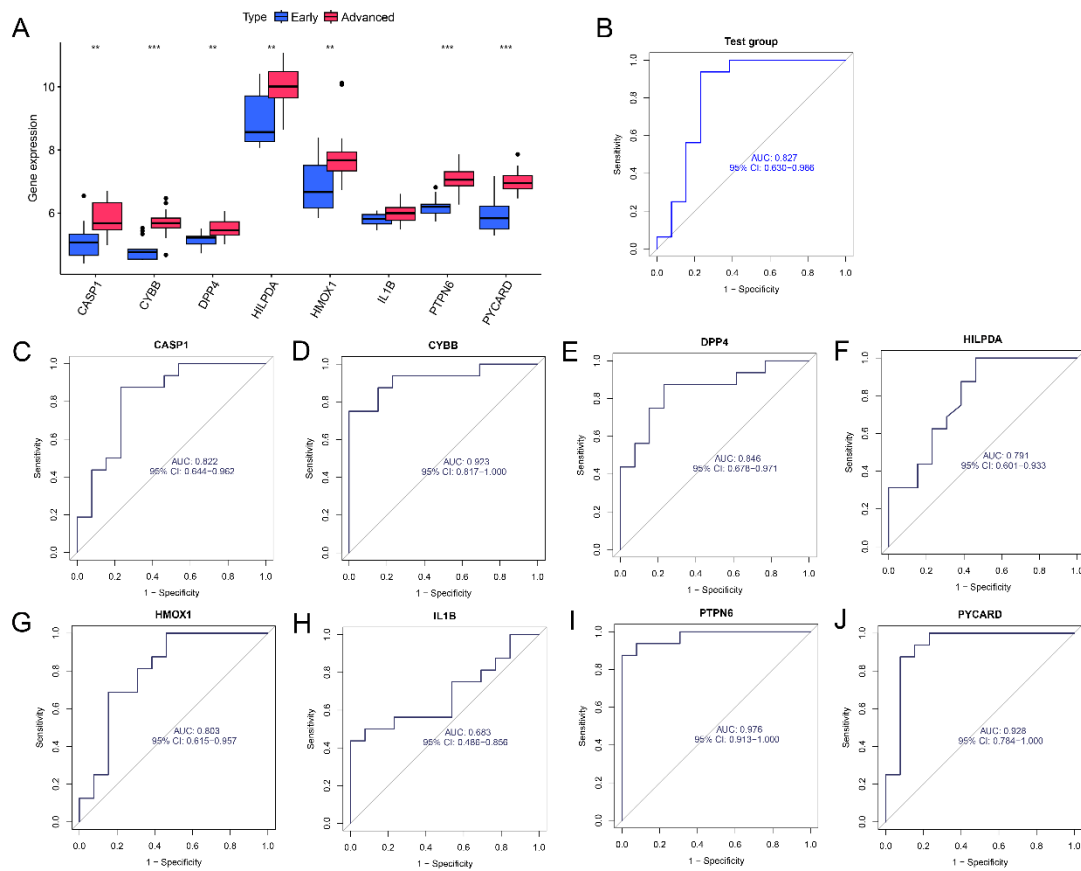

**Supplementary Figure 5.** External validation (GSE57691) to further test the diagnostic performance of ANN model and AS signature genes. (A) Differences in the expression of AS signature genes between different groups. (B) The ROC curves of the ANN model. (C-J) The ROC curves of the AS signature genes. \* indicates  $P < 0.05$  compared to cluster A, \*\* indicates  $P < 0.01$  compared to cluster A, and \*\*\* indicates  $P < 0.001$  compared to cluster A.

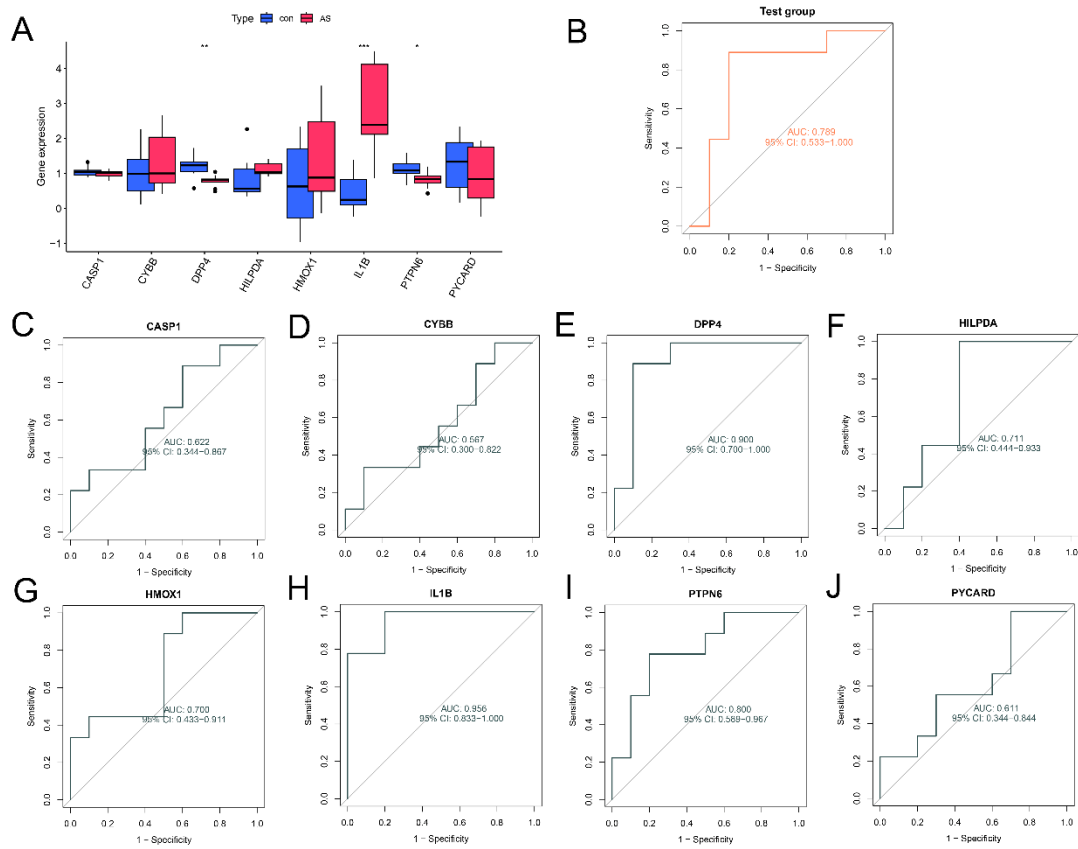

**Supplementary Figure 6. (A)** The expression of chemokines differed between the two clusters.

**(B)** Oxidative stress scores differed between the two clusters. **(C)** The expression of immune

checkpoints differed between the two clusters. \* indicates  $P < 0.05$  compared to cluster A, \*\*

indicates  $P < 0.01$  compared to cluster A, and \*\*\* indicates  $P < 0.001$  compared to cluster A.

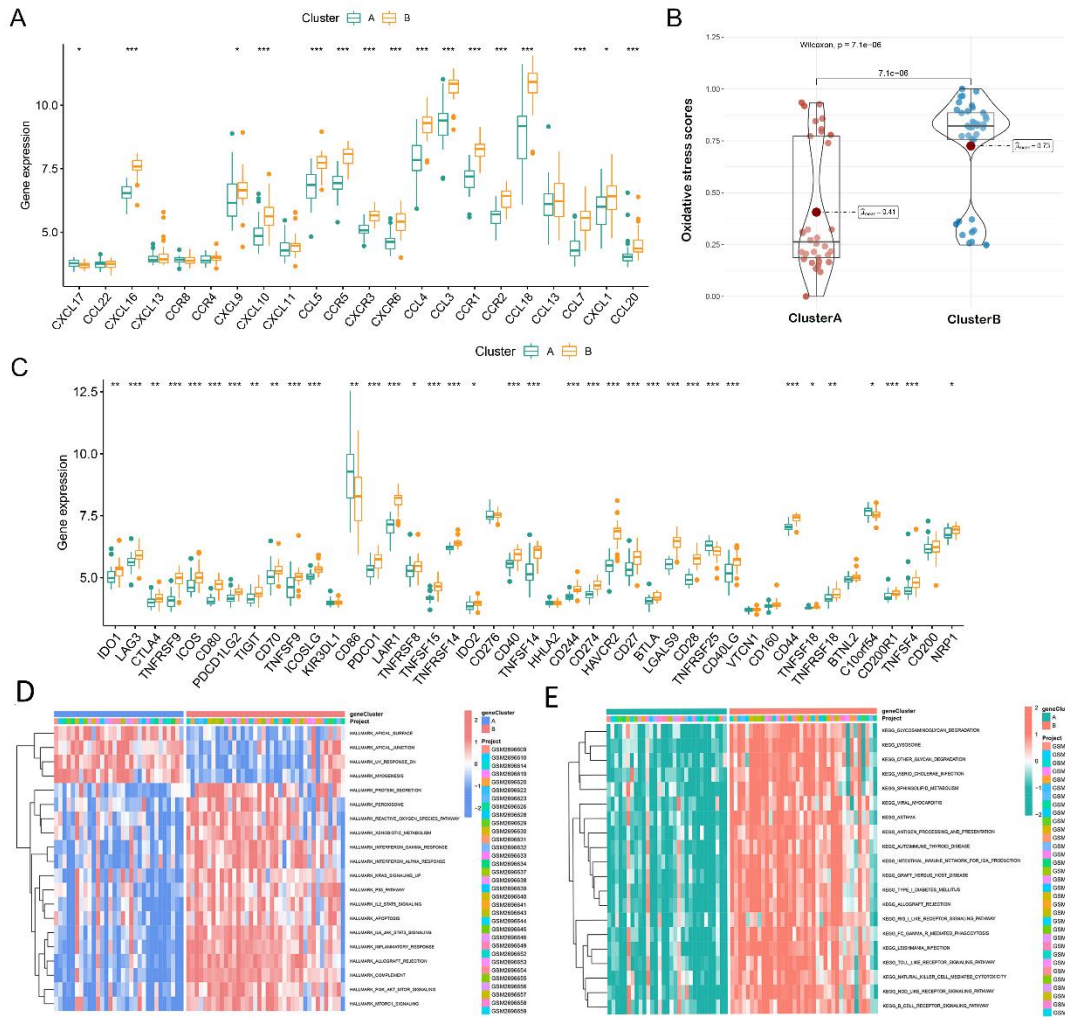

Supplementary Figure 7. tSNE plot of each cell subtype.

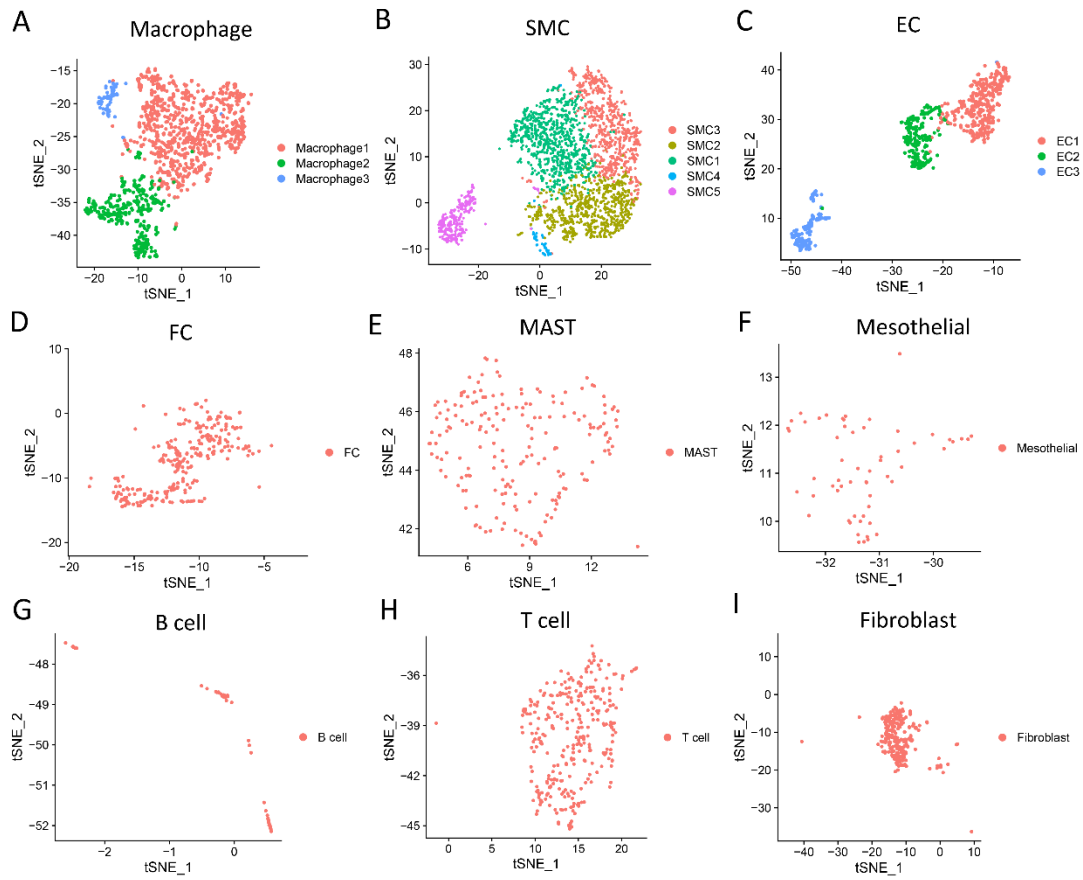

**Supplementary Table S1.** All genes included in the lytic cell death-related gene (LCDG) and

Oxidative stress

| <b>Pyroptosis</b> | <b>Necroptosis</b> | <b>Ferroptosis</b> | <b>Lytic cell death</b> | <b>Oxidative stress</b> |
|-------------------|--------------------|--------------------|-------------------------|-------------------------|
| RPL8              | TNF                | RPL8               | TNFRSF1A                | RYR2                    |
| IREB2             | TNFRSF1A           | IREB2              | TRADD                   | NOS3                    |
| ATP5MC3           | TRADD              | ATP5MC3            | TRAF2                   | NOS2                    |
| CS                | TRAF2              | CS                 | TRAF5                   | ELAC2                   |
| EMC2              | TRAF5              | EMC2               | RIPK1                   | TRDN                    |
| ACSF2             | RIPK1              | ACSF2              | BIRC2                   | CARS2                   |
| NOX1              | BIRC2              | NOX1               | BIRC3                   | CPT2                    |
| CYBB              | BIRC3              | CYBB               | XIAP                    | SOD1                    |
| NOX3              | XIAP               | NOX3               | RBCK1                   | CAT                     |
| NOX4              | RBCK1              | NOX4               | RNF31                   | SOD2-OT1                |
| NOX5              | RNF31              | NOX5               | SHARPIN                 | FARS2                   |
| DUOX1             | SHARPIN            | DUOX1              | SPATA2L                 | NOS1                    |
| DUOX2             | SPATA2L            | DUOX2              | SPATA2                  | MTO1                    |
| G6PD              | SPATA2             | G6PD               | CYLD                    | AIFM1                   |
| PGD               | CYLD               | PGD                | FADD                    | CASQ2                   |
| VDAC2             | FADD               | VDAC2              | CASP8                   | GFM1                    |
| PIK3CA            | CASP8              | PIK3CA             | CFLAR                   | TP53                    |
| FLT3              | CFLAR              | FLT3               | RIPK3                   | NFE2L2                  |
| SCP2              | RIPK3              | SCP2               | CYBB                    | HMOX1                   |
| TP53              | CYBB               | TP53               | CAMK2A                  | AARS2                   |
| ACSL4             | CAMK2A             | ACSL4              | CAMK2D                  | SOD2                    |
| LPCAT3            | CAMK2D             | LPCAT3             | CAMK2B                  | TNF                     |
| NRAS              | CAMK2B             | NRAS               | CAMK2G                  | POLR1C                  |
| KRAS              | CAMK2G             | KRAS               | SLC25A4                 | BDNF-AS                 |
| HRAS              | SLC25A4            | HRAS               | SLC25A5                 | MAPK14                  |
| TF                | SLC25A5            | TF                 | SLC25A6                 | NARS2                   |
| TFRC              | SLC25A6            | TFRC               | SLC25A31                | MAPK8                   |
| TFR2              | SLC25A31           | TFR2               | PPID                    | GSR                     |
| SLC38A1           | PPID               | SLC38A1            | VDAC1                   | OXSRI                   |
| SLC1A5            | VDAC1              | SLC1A5             | VDAC2                   | MTRFR                   |
| GLS2              | VDAC2              | GLS2               | VDAC3                   | XDH                     |
| GOT1              | VDAC3              | GOT1               | GLUD2                   | TUFM                    |
| CARS1             | GLUD2              | CARS1              | GLUD1                   | TXN                     |
| TP53              | GLUD1              | TP53               | GLUL                    | TSFM                    |
| ALOX5             | GLUL               | ALOX5              | PYGL                    | MPO                     |
| KEAP1             | PYGL               | KEAP1              | PYGM                    | OSGIN1                  |

|           |               |           |               |             |
|-----------|---------------|-----------|---------------|-------------|
| HMOX1     | PYGM          | HMOX1     | PYGB          | VAR52       |
| TP53      | PYGB          | TP53      | MAPK8         | PNPT1       |
| TP53      | MAPK8         | TP53      | MAPK10        | MAPK1       |
| GLS2      | MAPK10        | GLS2      | MAPK9         | LINC01672   |
| ATG5      | MAPK9         | ATG5      | FTH1          | IL6         |
| ATG7      | FTH1          | ATG7      | FTL           | EARS2       |
| NCOA4     | FTL           | NCOA4     | PLA2G4E       | OSER1       |
| TF        | PLA2G4E       | TF        | PLA2G4A       | G6PD        |
| ALOX5     | PLA2G4A       | ALOX5     | JMJD7-PLA2G4B | OLR1        |
| ALOX12    | JMJD7-PLA2G4B | ALOX12    | PLA2G4B       | SIRT1       |
| ALOX12B   | PLA2G4B       | ALOX12B   | PLA2G4C       | CYCS        |
| ALOX15    | PLA2G4C       | ALOX15    | PLA2G4D       | PARK7       |
| ALOX15B   | PLA2G4D       | ALOX15B   | PLA2G4F       | CASP3       |
| ALOXE3    | PLA2G4F       | ALOXE3    | ALOX15        | TXN2        |
| PHKG2     | ALOX15        | PHKG2     | CAPN1         | MTFMT       |
| TFRC      | CAPN1         | TFRC      | CAPN2         | OSGIN2      |
| ACO1      | CAPN2         | ACO1      | SMPD1         | IL1B        |
| IREB2     | SMPD1         | IREB2     | MLKL          | GPX1        |
| SLC38A1   | MLKL          | SLC38A1   | PGAM5         | NQO1        |
| GLS2      | PGAM5         | GLS2      | DNM1L         | CALM1       |
| G6PDX     | DNM1L         | G6PDX     | NLRP3         | HSPA5       |
| ULK1      | NLRP3         | ULK1      | PYCARD        | PON1        |
| ATG3      | PYCARD        | ATG3      | CASP1         | CXCL8       |
| ATG4D     | CASP1         | ATG4D     | IL1B          | MAP3K5      |
| ATG5      | IL1B          | ATG5      | CHMP2A        | APP         |
| BECN1     | CHMP2A        | BECN1     | CHMP2B        | CYBA        |
| MAP1LC3A  | CHMP2B        | MAP1LC3A  | CHMP3         | JUN         |
| GABARAPL2 | CHMP3         | GABARAPL2 | RNF103-CHMP3  | GTPBP3      |
| GABARAPL1 | RNF103-CHMP3  | GABARAPL1 | CHMP4B        | ALB         |
| ATG16L1   | CHMP4B        | ATG16L1   | CHMP4A        | TMX2-CTNND1 |
| WIPI1     | CHMP4A        | WIPI1     | CHMP4C        | INS         |
| WIPI2     | CHMP4C        | WIPI2     | CHMP6         | FASTKD2     |
| SNX4      | CHMP6         | SNX4      | VPS4B         | SMAD5-AS1   |
| ATG13     | VPS4B         | ATG13     | VPS4A         | ACADVL      |
| ULK2      | VPS4A         | ULK2      | CHMP1B        | PTGS2       |
| NCOA4     | CHMP1B        | NCOA4     | CHMP1A        | OGG1        |
| ACSL4     | CHMP1A        | ACSL4     | CHMP5         | FOXO3       |

|           |           |           |           |          |
|-----------|-----------|-----------|-----------|----------|
| TP53      | CHMP5     | TP53      | CHMP7     | PRDX2    |
| SAT1      | CHMP7     | SAT1      | TRPM7     | DDIT3    |
| ALOX15    | TRPM7     | ALOX15    | IL1A      | PARP1    |
| ACSL4     | IL1A      | ACSL4     | IL33      | CRP      |
| LPCAT3    | IL33      | LPCAT3    | HMGB1     | ATF4     |
| ALOX15    | HMGB1     | ALOX15    | TNFSF10   | GSTP1    |
| ACSL4     | TNFSF10   | ACSL4     | TNFRSF10A | MRPL44   |
| KEAP1     | TNFRSF10A | KEAP1     | TNFRSF10B | GSTM1    |
| EGFR      | TNFRSF10B | EGFR      | FASLG     | TARS2    |
| NOX4      | FASLG     | NOX4      | FAS       | CERNA3   |
| MAPK3     | FAS       | MAPK3     | FAF1      | AKT1     |
| MAPK1     | FAF1      | MAPK1     | IFNA1     | NOS1AP   |
| BID       | IFNA1     | BID       | IFNA2     | HADHA    |
| ACSL4     | IFNA2     | ACSL4     | IFNA4     | SLC6A4   |
| ZEB1      | IFNA4     | ZEB1      | IFNA5     | GFM2     |
| KEAP1     | IFNA5     | KEAP1     | IFNA6     | CRH      |
| DPP4      | IFNA6     | DPP4      | IFNA7     | XBP1     |
| ALOX15    | IFNA7     | ALOX15    | IFNA8     | KEAP1    |
| ALOX12    | IFNA8     | ALOX12    | IFNA10    | FOXO1    |
| CDKN2A    | IFNA10    | CDKN2A    | IFNA13    | MAPK10   |
| PEBP1     | IFNA13    | PEBP1     | IFNA14    | G3BP1    |
| SOCS1     | IFNA14    | SOCS1     | IFNA16    | BCL2     |
| CDO1      | IFNA16    | CDO1      | IFNA17    | HSF1     |
| MYB       | IFNA17    | MYB       | IFNA21    | CYBB     |
| HMOX1     | IFNA21    | HMOX1     | IFNB1     | EIF2AK3  |
| MAPK8     | IFNB1     | MAPK8     | IFNG      | RYR1     |
| MAPK9     | IFNG      | MAPK9     | IFNAR1    | HSPB1    |
| MAPK1     | IFNAR1    | MAPK1     | IFNAR2    | PRDX5    |
| MAPK3     | IFNAR2    | MAPK3     | IFNGR1    | HSP90AA1 |
| SLC1A5    | IFNGR1    | SLC1A5    | IFNGR2    | HADHB    |
| CHAC1     | IFNGR2    | CHAC1     | JAK1      | HSPA4    |
| MAPK14    | JAK1      | MAPK14    | JAK2      | ACADM    |
| LINC00472 | JAK2      | LINC00472 | JAK3      | IFNG     |
| NOX4      | JAK3      | NOX4      | TYK2      | NFKB1    |
| GOT1      | TYK2      | GOT1      | STAT1     | EDN1     |
| BECN1     | STAT1     | BECN1     | STAT2     | ADPRS    |
| PRKAA2    | STAT2     | PRKAA2    | STAT3     | MIPEP    |
| PRKAA1    | STAT3     | PRKAA1    | STAT4     | MSRA     |
| ELAVL1    | STAT4     | ELAVL1    | STAT5A    | EIF2S1   |
| BAP1      | STAT5A    | BAP1      | STAT5B    | PRKN     |

|         |           |         |           |          |
|---------|-----------|---------|-----------|----------|
| TP53    | STAT5B    | TP53    | STAT6     | GAPDH    |
| ABCC1   | STAT6     | ABCC1   | IRF9      | HIF1A    |
| ACSL4   | IRF9      | ACSL4   | EIF2AK2   | CPT1A    |
| MIR6852 | EIF2AK2   | MIR6852 | TLR4      | BDNF     |
| ACVR1B  | TLR4      | ACVR1B  | TICAM2    | CCL2     |
| TGFBR1  | TICAM2    | TGFBR1  | TICAM1    | APEX1    |
| BAP1    | TICAM1    | BAP1    | TLR3      | SNCA     |
| EPAS1   | TLR3      | EPAS1   | ZBP1      | NDUFS4   |
| HILPDA  | ZBP1      | HILPDA  | USP21     | VEGFA    |
| HIF1A   | USP21     | HIF1A   | SQSTM1    | H19      |
| ALOX12  | SQSTM1    | ALOX12  | HSP90AA1  | BAX      |
| ACSL4   | HSP90AA1  | ACSL4   | HSP90AB1  | CYP2D6   |
| HMOX1   | HSP90AB1  | HMOX1   | TNFAIP3   | HSPA1A   |
| IFNG    | TNFAIP3   | IFNG    | PARP1     | SLC25A26 |
| ANO6    | PARP1     | ANO6    | BID       | ACE      |
| LPIN1   | BID       | LPIN1   | BAX       | MRPS22   |
| HMGB1   | BAX       | HMGB1   | AIFM1     | TGFB1    |
| TNFAIP3 | AIFM1     | TNFAIP3 | H2AX      | SOD3     |
| TLR4    | H2AX      | TLR4    | H2AC20    | ANK2     |
| NOX4    | H2AC20    | NOX4    | H2AC12    | ATP5F1A  |
| ATF3    | H2AC12    | ATF3    | H2AC1     | CAV1     |
| ATM     | H2AC1     | ATM     | H2AW      | CP       |
| YY1AP1  | H2AW      | YY1AP1  | H2AB3     | MAPK9    |
| EGLN2   | H2AB3     | EGLN2   | H2AC8     | ABL1     |
| MIOX    | H2AC8     | MIOX    | H2AC4     | CYP1A1   |
| TAZ     | H2AC4     | TAZ     | MACROH2A2 | NR3C1    |
| MTDH    | MACROH2A2 | MTDH    | MACROH2A1 | CYP3A4   |
| IDH1    | MACROH2A1 | IDH1    | H2AC19    | PRDX6    |
| SIRT1   | H2AC19    | SIRT1   | H2AJ      | STIP1    |
| TAZ     | H2AJ      | TAZ     | H2AB1     | GSTT1    |
| BECN1   | H2AB1     | BECN1   | H2AC17    | UCP2     |
| FBXW7   | H2AC17    | FBXW7   | H2AC18    | ACADS    |
| PANX1   | H2AC18    | PANX1   | H2AC11    | FOS      |
| DNAJB6  | H2AC11    | DNAJB6  | H2AC21    | NFS1     |
| BACH1   | H2AC21    | BACH1   | H2AZ2     | VWF      |
| ACSL4   | H2AZ2     | ACSL4   | H2AC7     | PGR-AS1  |
| LONP1   | H2AC7     | LONP1   | H2AZ1     | MAOA     |
| CD82    | H2AZ1     | CD82    | H2AC15    | HBG2     |
| IL1B    | H2AC15    | IL1B    | H2AC6     | ATM      |

|             |        |             |         |          |
|-------------|--------|-------------|---------|----------|
| CTSB        | H2AC6  | CTSB        | H2AC13  | C1QBP    |
| POR         | H2AC13 | POR         | H2AC14  | CYP2E1   |
| CYB5R1      | H2AC14 | CYB5R1      | H2AC16  | APOE     |
| ELOVL5      | H2AC16 | ELOVL5      | H2AB2   | CYP1A2   |
| FADS1       | H2AB2  | FADS1       | PPIA    | QRSL1    |
| ALOX12      | PPIA   | ALOX12      | BCL2    | NPY      |
| FBW7        | BCL2   | FBW7        | RPL8    | PRDX3    |
| PTEN        |        | PTEN        | IREB2   | PRKCD    |
| NR1D1       |        | NR1D1       | ATP5MC3 | ATF6     |
| NR1D2       |        | NR1D2       | CS      | SHC1     |
| TBK1        |        | TBK1        | EMC2    | NUDT1    |
| IL6         |        | IL6         | ACSF2   | KNG1     |
| USP7        |        | USP7        | NOX1    | PRDX1    |
| miR-182-5p  |        | miR-182-5p  | NOX3    | FMO3     |
| miR-378a-3p |        | miR-378a-3p | NOX4    | PPARGC1A |
| CTSB        |        | CTSB        | NOX5    | MAPK3    |
| ACSL4       |        | ACSL4       | DUOX1   | HSD17B4  |
| ATF4        |        | ATF4        | DUOX2   | MRPS34   |
| BECN1       |        | BECN1       | G6PD    | PPARG    |
| AQP3        |        | AQP3        | PGD     | SELENON  |
| AQP5        |        | AQP5        | PIK3CA  | POMC     |
| AQP8        |        | AQP8        | FLT3    | ATP5F1B  |
| LINC00618   |        | LINC00618   | SCP2    | SDHA     |
| IREB2       |        | IREB2       | TP53    | SCN5A    |
| MT1DP       |        | MT1DP       | ACSL4   | G3BP2    |
| ACSL4       |        | ACSL4       | LPCAT3  | PINK1    |
| PEX10       |        | PEX10       | NRAS    | CREB1    |
| KEAP1       |        | KEAP1       | KRAS    | POLRMT   |
| AGPAT3      |        | AGPAT3      | HRAS    | ERN1     |
| PEX12       |        | PEX12       | TF      | TRMT10C  |
| CHP1        |        | CHP1        | TFRC    | TLR4     |
| GPAT4       |        | GPAT4       | TFR2    | SERP1    |
| BRPF1       |        | BRPF1       | SLC38A1 | COX5A    |
| OSBPL9      |        | OSBPL9      | SLC1A5  | CAV3     |
| INTS2       |        | INTS2       | GLS2    | ICAM1    |
| MMD         |        | MMD         | GOT1    | PTCD3    |
| CYP4F8      |        | CYP4F8      | CARS1   | MTOR     |
| MLLT1       |        | MLLT1       | ALOX5   | GPX3     |
| TTPA        |        | TTPA        | KEAP1   | HSPA8    |
| GRIA3       |        | GRIA3       | HMOX1   | NOX4     |

|                  |  |                  |           |            |
|------------------|--|------------------|-----------|------------|
| EPT1             |  | EPT1             | ATG5      | MRPS16     |
| POM121L12        |  | POM121L12        | ATG7      | CDKN1A     |
| LIG3             |  | LIG3             | NCOA4     | MAOB       |
| AEBP2            |  | AEBP2            | ALOX12    | FXN        |
| AGPS             |  | AGPS             | ALOX12B   | IL10       |
| CDCA3            |  | CDCA3            | ALOX15B   | LMNA       |
| PEX2             |  | PEX2             | ALOXE3    | ACAD9      |
| LPCAT3           |  | LPCAT3           | PHKG2     | VAR51      |
| PEX6             |  | PEX6             | ACO1      | P4HB       |
| TIMM9            |  | TIMM9            | G6PDX     | ACOX1      |
| DCAF7            |  | DCAF7            | ULK1      | MIR7-3HG   |
| LCE2C            |  | LCE2C            | ATG3      | TRPM2      |
| FAR1             |  | FAR1             | ATG4D     | MRPL12     |
| PHF21A           |  | PHF21A           | BECN1     | TRIT1      |
| SMAD7            |  | SMAD7            | MAP1LC3A  | GCH1       |
| LYRM1            |  | LYRM1            | GABARAPL2 | TXNRD1     |
| AMN              |  | AMN              | GABARAPL1 | CACNA1C    |
| PEX3             |  | PEX3             | ATG16L1   | TXNIP      |
| MTCH1            |  | MTCH1            | WIPI1     | CALM3      |
| ZEB1             |  | ZEB1             | WIPI2     | SDHB       |
| SIRT1            |  | SIRT1            | SNX4      | EMSLR      |
| ACADSB           |  | ACADSB           | ATG13     | PRKAA1     |
| PVT1             |  | PVT1             | ULK2      | HBB        |
| hsa_circ_0008367 |  | hsa_circ_0008367 | SAT1      | MAP2K4     |
| SLC39A14         |  | SLC39A14         | EGFR      | SFXN4      |
| NCOA4            |  | NCOA4            | MAPK3     | ALDH2      |
| MAP3K11          |  | MAP3K11          | MAPK1     | CD36       |
| GSK3B            |  | GSK3B            | ZEB1      | CASP9      |
| MAPK8            |  | MAPK8            | DPP4      | CLU        |
| BRD7             |  | BRD7             | CDKN2A    | ADIPOQ     |
| TP53             |  | TP53             | PEBP1     | KCNJ5      |
| SLC25A28         |  | SLC25A28         | SOCS1     | AGTR1      |
| ACSL4            |  | ACSL4            | CDO1      | OXR1       |
| MFN2             |  | MFN2             | MYB       | ETFDH      |
| ACSL4            |  | ACSL4            | CHAC1     | EIF2AK2    |
| SLC11A2          |  | SLC11A2          | MAPK14    | SP1        |
| ZFAS1            |  | ZFAS1            | LINC00472 | APOA1      |
| SLC38A1          |  | SLC38A1          | PRKAA2    | TRA-TGC7-1 |

|         |  |         |             |          |
|---------|--|---------|-------------|----------|
| TSC1    |  | TSC1    | PRKAA1      | MRPS2    |
| PEBP1   |  | PEBP1   | ELAVL1      | ACADL    |
| TGFB1   |  | TGFB1   | BAP1        | CRHR1    |
| SNCA    |  | SNCA    | ABCC1       | PRKAA2   |
| SIRT3   |  | SIRT3   | MIR6852     | NOX1     |
| PRKAA2  |  | PRKAA2  | ACVR1B      | BLVRB    |
| TFRC    |  | TFRC    | TGFBR1      | LYRM4    |
| CGAS    |  | CGAS    | EPAS1       | PRORP    |
| STING1  |  | STING1  | HILPDA      | KCNH2    |
| HDDC3   |  | HDDC3   | HIF1A       | SQSTM1   |
| MIR761  |  | MIR761  | ANO6        | MAP2K6   |
| MDM2    |  | MDM2    | LPIN1       | ESR1     |
| MDM4    |  | MDM4    | ATF3        | PPARA    |
| ALOX15  |  | ALOX15  | ATM         | EHHADH   |
| POR     |  | POR     | YY1AP1      | MDM2     |
| MIR214  |  | MIR214  | EGLN2       | SLC25A20 |
| DLD     |  | DLD     | MIOX        | ABCD1    |
| LONP1   |  | LONP1   | TAZ         | VCAM1    |
| ACSL4   |  | ACSL4   | MTDH        | IL1A     |
| BACH1   |  | BACH1   | IDH1        | NUBPL    |
| DNAJB6  |  | DNAJB6  | SIRT1       | GPX7     |
| WWTR1   |  | WWTR1   | FBXW7       | GATB     |
| SIRT1   |  | SIRT1   | PANX1       | SNTA1    |
| ATM     |  | ATM     | DNAJB6      | AGT      |
| PRKCA   |  | PRKCA   | BACH1       | STAT3    |
| LGMN    |  | LGMN    | LONP1       | OXT      |
| ACSL4   |  | ACSL4   | CD82        | SRC      |
| TP53    |  | TP53    | CTSB        | MAPKAPK2 |
| IFNG    |  | IFNG    | POR         | VCP      |
| SMPD1   |  | SMPD1   | CYB5R1      | BRCA1    |
| MYCN    |  | MYCN    | ELOVL5      | SDHD     |
| SLC11A2 |  | SLC11A2 | FADS1       | HADH     |
| IFNA1   |  | IFNA1   | FBW7        | MAPK11   |
| IFNA2   |  | IFNA2   | PTEN        | HMGB1    |
| IFNA4   |  | IFNA4   | NR1D1       | MT-CO1   |
| IFNA5   |  | IFNA5   | NR1D2       | ATF2     |
| IFNA6   |  | IFNA6   | TBK1        | PDE5A    |
| IFNA7   |  | IFNA7   | IL6         | EIF2AK1  |
| IFNA8   |  | IFNA8   | USP7        | PLA2G7   |
| IFNA10  |  | IFNA10  | miR-182-5p  | MSRB2    |
| IFNA13  |  | IFNA13  | miR-378a-3p | MICOS13  |
| IFNA14  |  | IFNA14  | ATF4        | NR3C2    |
| IFNA16  |  | IFNA16  | AQP3        | LEP      |

|           |  |           |                  |            |
|-----------|--|-----------|------------------|------------|
| IFNA17    |  | IFNA17    | AQP5             | MAPT       |
| IFNA21    |  | IFNA21    | AQP8             | TRA-TGC5-1 |
| SMG9      |  | SMG9      | LINC00618        | TRMT5      |
| NR1D1     |  | NR1D1     | MT1DP            | NDUFS8     |
| ACSL4     |  | ACSL4     | PEX10            | COMT       |
| PPARG     |  | PPARG     | AGPAT3           | ETFA       |
| TLR4      |  | TLR4      | PEX12            | POLG       |
| IL6       |  | IL6       | CHP1             | TF         |
| miR-335   |  | miR-335   | GPAT4            | NCF2       |
| ATF3      |  | ATF3      | BRPF1            | GATC       |
| HMOX1     |  | HMOX1     | OSBPL9           | GLRX       |
| HMGB1     |  | HMGB1     | INTS2            | MRPL3      |
| EPAS1     |  | EPAS1     | MMD              | MB         |
| SNX5      |  | SNX5      | CYP4F8           | PON2       |
| PAQR3     |  | PAQR3     | MLLT1            | MSRB1      |
| MICU1     |  | MICU1     | TTPA             | CS         |
| NOX4      |  | NOX4      | GRIA3            | GCLC       |
| TOR2A     |  | TOR2A     | EPT1             | KCNQ1      |
| MIR375    |  | MIR375    | POM121L12        | TIMM22     |
| MAP3K14   |  | MAP3K14   | LIG3             | FKBP5      |
| SIRT3     |  | SIRT3     | AEBP2            | EPO        |
| CircKDM4C |  | CircKDM4C | AGPS             | CYP1B1     |
| MIR324    |  | MIR324    | CDCA3            | CDKN2A     |
| QSOX1     |  | QSOX1     | PEX2             | SERPINE1   |
| MIB2      |  | MIB2      | PEX6             | PTGS1      |
| CLTRN     |  | CLTRN     | TIMM9            | HMOX2      |
| KLF2      |  | KLF2      | DCAF7            | PRDX4      |
| MIR5096   |  | MIR5096   | LCE2C            | MAP2K3     |
| TFRC      |  | TFRC      | FAR1             | CYP2C9     |
| HOTAIR    |  | HOTAIR    | PHF21A           | UCP3       |
| H19       |  | H19       | SMAD7            | RHOA       |
| FOXO4     |  | FOXO4     | LYRM1            | POR        |
| ELAVL1    |  | ELAVL1    | AMN              | AGER       |
| YTHDC2    |  | YTHDC2    | PEX3             | RPS6KA5    |
| DDR2      |  | DDR2      | MTCH1            | SIRT3      |
| SLC39A7   |  | SLC39A7   | ACADSB           | SELP       |
| TRIM46    |  | TRIM46    | PVT1             | CYGB       |
| ACSL1     |  | ACSL1     | hsa_circ_0008367 | FAS        |
| KDM5A     |  | KDM5A     | SLC39A14         | MRPS7      |
| TRIM21    |  | TRIM21    | MAP3K11          | KCNE1      |
| HMOX1     |  | HMOX1     | GSK3B            | SELE       |

|                       |  |                       |           |              |
|-----------------------|--|-----------------------|-----------|--------------|
| DPEP1                 |  | DPEP1                 | BRD7      | EP300        |
| CYGB                  |  | CYGB                  | SLC25A28  | CYP2C19      |
| IDO1                  |  | IDO1                  | MFN2      | PSEN1        |
| GSTZ1                 |  | GSTZ1                 | SLC11A2   | EME2         |
| TP53                  |  | TP53                  | ZFAS1     | IGF1         |
| ACO1                  |  | ACO1                  | TSC1      | ANXA5        |
| GJA1                  |  | GJA1                  | TGFB1     | PRKCB        |
| IREB2                 |  | IREB2                 | SNCA      | GGT1         |
| SLC7A11               |  | SLC7A11               | SIRT3     | STK25        |
| PGRMC1                |  | PGRMC1                | CGAS      | FMO1         |
| CIRBP                 |  | CIRBP                 | STING1    | C2orf69      |
| FAR1                  |  | FAR1                  | HDDC3     | MAP2K7       |
| circPSEN1             |  | circPSEN1             | MIR761    | PIK3CG       |
| USP11                 |  | USP11                 | MDM2      | HERPUD1      |
| STING1                |  | STING1                | MDM4      | BCL2L1       |
| YAP                   |  | YAP                   | MIR214    | CALM2        |
| HMOX1                 |  | HMOX1                 | DLD       | SCARNA5      |
| MIR135B               |  | MIR135B               | WWTR1     | SGCB         |
| TRIM26                |  | TRIM26                | PRKCA     | MMP2         |
| YAP                   |  | YAP                   | LGMN      | GPX4         |
| NDRG1                 |  | NDRG1                 | MYCN      | LOC110806262 |
| MIR302A               |  | MIR302A               | SMG9      | TTN          |
| ASMTL-AS1             |  | ASMTL-AS1             | PPARG     | SLC2A1       |
| ZFAS1                 |  | ZFAS1                 | miR-335   | PCNA         |
| FADS2                 |  | FADS2                 | SNX5      | ATF3         |
| PIEZO1                |  | PIEZO1                | PAQR3     | SESN2        |
| LIFR                  |  | LIFR                  | MICU1     | DDAH2        |
| PTPN6                 |  | PTPN6                 | TOR2A     | LINC02605    |
| MIR15A                |  | MIR15A                | MIR375    | MUTYH        |
| EGR1                  |  | EGR1                  | MAP3K14   | VHL          |
| ADAM23                |  | ADAM23                | CircKDM4C | TARDBP       |
| ARHGEF26-AS1          |  | ARHGEF26-AS1          | MIR324    | SRXN1        |
| ACSL4                 |  | ACSL4                 | QSOX1     | ATP2A2       |
| CPEB1                 |  | CPEB1                 | MIB2      | MALAT1       |
| COX4I2                |  | COX4I2                | CLTRN     | SLC25A4      |
| lncRNA AABR07017145.1 |  | lncRNA AABR07017145.1 | KLF2      | MTHFR        |
| TIMP1                 |  | TIMP1                 | MIR5096   | TPO          |

|         |  |         |                          |                |
|---------|--|---------|--------------------------|----------------|
| MIR15A  |  | MIR15A  | HOTAIR                   | MRPS25         |
| KDM6B   |  | KDM6B   | H19                      | MT-CYB         |
| NCOA4   |  | NCOA4   | FOXO4                    | HTR2A          |
| GSK3B   |  | GSK3B   | YTHDC2                   | NLRP3          |
| IFNG    |  | IFNG    | DDR2                     | RAC1           |
| METTL14 |  | METTL14 | SLC39A7                  | EGFR           |
| CHAC1   |  | CHAC1   | TRIM46                   | NCF1           |
| MIB1    |  | MIB1    | ACSL1                    | KDR            |
| KDM5C   |  | KDM5C   | KDM5A                    | GSTA1          |
| ACSL4   |  | ACSL4   | TRIM21                   | TERT           |
| MEG3    |  | MEG3    | DPEP1                    | PTGIS          |
| CCDC6   |  | CCDC6   | CYGB                     | TXNRD2         |
| ATF3    |  | ATF3    | IDO1                     | KRIT1          |
| IREB2   |  | IREB2   | GSTZ1                    | NDUFS2         |
| CFL1    |  | CFL1    | GJA1                     | NDUFS1         |
|         |  | SLC7A11 | SLC7A11                  | REN            |
|         |  | GPX4    | PGRMC1                   | DYNLL1         |
|         |  | AKR1C1  | CIRBP                    | EPHX1          |
|         |  | AKR1C2  | circPSEN1                | CRYAB          |
|         |  | AKR1C3  | USP11                    | ETFB           |
|         |  | GPX4    | YAP                      | ALOX5          |
|         |  | RB1     | MIR135B                  | MAP2K1         |
|         |  | HSPB1   | TRIM26                   | NOSTRIN        |
|         |  | HSF1    | NDRG1                    | MYC            |
|         |  | SLC7A11 | MIR302A                  | NPPA           |
|         |  | GPX4    | ASMTL-AS1                | OXTR           |
|         |  | GCLC    | FADS2                    | MRPS28         |
|         |  | SLC7A11 | PIEZO1                   | MAPK13         |
|         |  | NFE2L2  | LIFR                     | ASL            |
|         |  | SQSTM1  | PTPN6                    | GCLM           |
|         |  | NQO1    | MIR15A                   | SIRT2          |
|         |  | HMOX1   | EGR1                     | CHKB-<br>CPT1B |
|         |  | FTH1    | ADAM23                   | PTEN           |
|         |  | MUC1    | ARHGEF26-AS1             | PPP1R15A       |
|         |  | SLC3A2  | CPEB1                    | CEBPB          |
|         |  | MT1G    | COX4I2                   | SUOX           |
|         |  | NFE2L2  | lncRNA<br>AABR07017145.1 | ADCYAP1        |
|         |  | SLC40A1 | TIMP1                    | HSPD1          |
|         |  | SLC7A11 | KDM6B                    | BMP6           |
|         |  | GPX4    | METTL14                  | MRPS14         |
|         |  | SLC7A11 | MIB1                     | JAK2           |

|  |  |         |           |          |
|--|--|---------|-----------|----------|
|  |  | CISD1   | KDM5C     | UQCRFS1  |
|  |  | SLC7A11 | MEG3      | MRPS23   |
|  |  | FANCD2  | CCDC6     | CALR     |
|  |  | GPX4    | CFL1      | HP       |
|  |  | NFE2L2  | GPX4      | TIA1     |
|  |  | FTMT    | AKR1C1    | HYOU1    |
|  |  | HSPA5   | AKR1C2    | MT-ND1   |
|  |  | ATF4    | AKR1C3    | HSP90B1  |
|  |  | SLC7A11 | RB1       | NDUFV1   |
|  |  | GPX4    | HSPB1     | MGST1    |
|  |  | GPX4    | HSF1      | HSD17B10 |
|  |  | HMOX1   | GCLC      | H6PD     |
|  |  | ATF4    | NFE2L2    | ADRB2    |
|  |  | NFE2L2  | NQO1      | PGD      |
|  |  | TP53    | MUC1      | SNORD15A |
|  |  | SLC7A11 | SLC3A2    | CALCA    |
|  |  | HELLS   | MT1G      | CASP8    |
|  |  | SCD     | SLC40A1   | NFE2L1   |
|  |  | FADS2   | CISD1     | PRKCZ    |
|  |  | SRC     | FANCD2    | MMP9     |
|  |  | STAT3   | FTMT      | NOSIP    |
|  |  | NFE2L2  | HSPA5     | HTRA2    |
|  |  | PML     | HELLS     | EIF4E    |
|  |  | MTOR    | SCD       | AKR1A1   |
|  |  | NFS1    | SRC       | EGF      |
|  |  | TP63    | PML       | LONP1    |
|  |  | SLC7A11 | MTOR      | CYP2B6   |
|  |  | TP53    | NFS1      | BCL2L11  |
|  |  | CDKN1A  | TP63      | PRL      |
|  |  | MIR137  | CDKN1A    | OGDH     |
|  |  | SLC40A1 | MIR137    | GAS5     |
|  |  | GPX4    | ENPP2     | EPRS1    |
|  |  | GPX4    | FH        | TH       |
|  |  | ENPP2   | CISD2     | ALDH3A2  |
|  |  | VDAC2   | MIR9-1    | ARG1     |
|  |  | FH      | MIR9-2    | MAPKAPK3 |
|  |  | CISD2   | MIR9-3    | GLRX2    |
|  |  | SLC40A1 | CBS       | THBS1    |
|  |  | MIR9-1  | ISCU      | GSS      |
|  |  | MIR9-2  | ACSL3     | PRKCA    |
|  |  | MIR9-3  | OTUB1     | PRKD1    |
|  |  | CBS     | CD44      | GJA1     |
|  |  | NFE2L2  | LINC00336 | TAMM41   |

|  |  |           |          |         |
|--|--|-----------|----------|---------|
|  |  | SQSTM1    | BRD4     | THBD    |
|  |  | GPX4      | PRDX6    | NGB     |
|  |  | ISCU      | MIR17    | PIK3CA  |
|  |  | FTH1      | SESN2    | TYR     |
|  |  | ACSL3     | NF2      | MEG3    |
|  |  | OTUB1     | ARNTL    | ADH5    |
|  |  | CD44      | JUN      | IL18    |
|  |  | LINC00336 | CA9      | ARG2    |
|  |  | STAT3     | TMBIM4   | SIRT6   |
|  |  | BRD4      | PLIN2    | ASS1    |
|  |  | PRDX6     | MIR212   | VIP     |
|  |  | MIR17     | Fer1HCH  | NTHL1   |
|  |  | SCD       | AIFM2    | PTK2B   |
|  |  | SESN2     | LAMP2    | DUSP1   |
|  |  | NF2       | ZFP36    | RMRP    |
|  |  | ARNTL     | PROM2    | SMPD1   |
|  |  | HIF1A     | CAV1     | HSPA9   |
|  |  | JUN       | GCH1     | CHAT    |
|  |  | CA9       | DAZAP1   | GSK3B   |
|  |  | HSPA5     | PIR      | UCP1    |
|  |  | TMBIM4    | HCAR1    | RPS27A  |
|  |  | HSPA5     | SLC16A1  | ERO1A   |
|  |  | PLIN2     | RRM2     | GHRL    |
|  |  | MIR212    | NR4A1    | FMO5    |
|  |  | Fer1HCH   | RPTOR    | PRKG1   |
|  |  | AIFM2     | SREBF1   | PRKAB1  |
|  |  | AIFM2     | SREBF2   | AKR1B1  |
|  |  | LAMP2     | FZD7     | ATR     |
|  |  | ZFP36     | P4HB     | BCKDHB  |
|  |  | GPX4      | NT5DC2   | CDK2    |
|  |  | PROM2     | BCAT2    | CYP11B2 |
|  |  | CHMP5     | PLA2G6   | NPPB    |
|  |  | CHMP6     | MIR424   | ACP1    |
|  |  | AKR1C1    | PARK7    | DLD     |
|  |  | AKR1C2    | FXN      | SDHC    |
|  |  | AKR1C3    | SUV39H1  | ABCC1   |
|  |  | CBS       | ATF2     | HFE     |
|  |  | NFE2L2    | ACOT1    | GLO1    |
|  |  | CAV1      | ALDH3A2  | APOB    |
|  |  | GCH1      | STK11    | NDUFB9  |
|  |  | SIRT3     | FNDC5    | DRD2    |
|  |  | DAZAP1    | CircIL4R | BAK1    |
|  |  | PIR       | CDH1     | MAPK12  |

|  |  |          |            |              |
|--|--|----------|------------|--------------|
|  |  | GCLC     | NEDD4L     | NRF1         |
|  |  | FTL      | BRD2       | BMP2         |
|  |  | HCAR1    | BRD3       | SLC7A11      |
|  |  | SLC16A1  | BRDT       | EEF1A1       |
|  |  | RRM2     | DECR1      | STUB1        |
|  |  | SCD      | GLRX5      | NFKBIA       |
|  |  | NR4A1    | NCOA3      | HSPA1B       |
|  |  | PIK3CA   | NR5A2      | FMO2         |
|  |  | RPTOR    | PANX2      | TLR2         |
|  |  | SREBF1   | RHEBP1     | BRCA2        |
|  |  | SREBF2   | TFAP2A     | EGR1         |
|  |  | FZD7     | CP         | CFTR         |
|  |  | NFE2L2   | ARF6       | SCARA3       |
|  |  | NFE2L2   | GDF15      | SLC6A3       |
|  |  | P4HB     | ABHD12     | TRE-TTC3-1   |
|  |  | NT5DC2   | PPP1R13L   | LOC110973015 |
|  |  | BCAT2    | TFAM       | DLEU2        |
|  |  | HSF1     | KDM3B      | ERCC8        |
|  |  | PLA2G6   | RNF113A    | NDUFAF2      |
|  |  | MIR424   | AHCY       | CBS          |
|  |  | PARK7    | circ-TTBK2 | DDAH1        |
|  |  | FXN      | MIR522     | CYC1         |
|  |  | SUV39H1  | IDH2       | CHUK         |
|  |  | ATF2     | PPARA      | FN1          |
|  |  | CDKN1A   | NOS2       | CREBBP       |
|  |  | FTH1     | SIAH2      | STK4         |
|  |  | NFE2L2   | RELA       | HTR1A        |
|  |  | STAT3    | VDR        | SETD2        |
|  |  | ACOT1    | NEDD4      | NDUFS7       |
|  |  | NFE2L2   | PRDX1      | NEIL1        |
|  |  | ALDH3A2  | AR         | ALDH9A1      |
|  |  | NFE2L2   | MTF1       | LDHA         |
|  |  | STK11    | COPZ1      | TNFRSF1A     |
|  |  | FNDC5    | NUPR1      | PTPN1        |
|  |  | CircIL4R | USP35      | CDKN3        |
|  |  | CDH1     | NEAT1      | WARS2        |
|  |  | NFE2L2   | PARP2      | INSR         |
|  |  | MIR214   | PARP3      | MT-CO2       |
|  |  | NEDD4L   | PARP4      | LPO          |
|  |  | SQSTM1   | PARP6      | CTNNB1       |
|  |  | TF       | PARP8      | SCN4B        |

|  |  |            |              |                  |
|--|--|------------|--------------|------------------|
|  |  | FTMT       | PARP9        | BCS1L            |
|  |  | BRD2       | PARP10       | CRAT             |
|  |  | BRD3       | PARP11       | PTK2             |
|  |  | BRD4       | PARP12       | ECHS1            |
|  |  | BRDT       | PARP14       | ISCU             |
|  |  | SCD        | PARP15       | TRAF2            |
|  |  | SLC7A11    | PARP16       | MT-TL1           |
|  |  | DECR1      | PDSS2        | GADD45A          |
|  |  | NFE2L2     | TXN          | RELA             |
|  |  | GPX4       | SENP1        | MT-ATP6          |
|  |  | SLC7A11    | OIP5-AS1     | LRRK2            |
|  |  | NFE2L2     | MIR190A      | NDUFA6           |
|  |  | GLRX5      | FGF21        | MIR21            |
|  |  | GPX4       | CREB1        | MT-CO3           |
|  |  | NCOA3      | CREB3        | CDKN1B           |
|  |  | NR5A2      | CREB5        | ADM              |
|  |  | GPX4       | MIR130B      | COX4I1           |
|  |  | MTOR       | BEX1         | GSTM3            |
|  |  | PANX2      | ASAH2        | SLC22A5          |
|  |  | RHEBP1     | FABP4        | ATP13A2          |
|  |  | TFAP2A     | AKT1S1       | MYH7             |
|  |  | CP         | MLST8        | LOC111365<br>141 |
|  |  | SLC7A11    | TYRO3        | FAM120A          |
|  |  | ARF6       | SIRT6        | FDXR             |
|  |  | GDF15      | TMSB4X       | DLG4             |
|  |  | ABHD12     | TMSB4Y       | CRHR2            |
|  |  | PPP1R13L   | KIF20A       | MIEF2            |
|  |  | TFAM       | ECH1         | CNR1             |
|  |  | KDM3B      | circRHOT1    | DAXX             |
|  |  | RNF113A    | ETV4         | AOC3             |
|  |  | PARK7      | MEG8         | ACO2             |
|  |  | AHCY       | VCP          | XRCC1            |
|  |  | FXN        | circ_0007142 | RNY5             |
|  |  | circ-TTBK2 | RBMS1        | PRNP             |
|  |  | MIR522     | KDM4A        | CUL3             |
|  |  | IDH2       | MGST1        | HRAS             |
|  |  | PPARA      | circKIF4A    | HBA1             |
|  |  | NOS2       | miR-7-5p     | UGT1A1           |
|  |  | SIAH2      | circ_0067934 | FASLG            |
|  |  | RELA       | MPC1         | PPARD            |
|  |  | PRKAA2     | CAMKK2       | AKAP9            |
|  |  | VDR        | SOX2         | SCP2             |

|  |  |         |                    |            |
|--|--|---------|--------------------|------------|
|  |  | NEDD4   | SRSF9              | IKBKB      |
|  |  | FXN     | PROK2              | ALDH1A1    |
|  |  | AIFM2   | MIR4443            | IL2        |
|  |  | PRDX1   | SIRT2              | NDUFS3     |
|  |  | AR      | circRNA1615        | SESN1      |
|  |  | CBS     | MIR27A             | IDH1       |
|  |  | NFE2L2  | MIR670             | AHSP       |
|  |  | CHMP5   | MEF2C              | GCDH       |
|  |  | CHMP6   | EZH2               | DSP        |
|  |  | HMOX1   | PEDS1              | CYP2A6     |
|  |  | ZFP36   | ADAMTS13           | CTSB       |
|  |  | LAMP2   | CDC25A             | MDH2       |
|  |  | MTF1    | SFRS9              | CLEC4A     |
|  |  | COPZ1   | CAV                | PAH        |
|  |  | NUPR1   | CircFNDC3B         | LINC01554  |
|  |  | USP35   | PPARD              | BAD        |
|  |  | HSF1    | ENO3               | IRS1       |
|  |  | PROM2   | LCN2               | MTR        |
|  |  | PLA2G6  | MARCHF5            | CASP2      |
|  |  | HIF1A   | TRIB2              | SST        |
|  |  | NEAT1   | DHODH              | FMO4       |
|  |  | RRM2    | MIR545             | CDC42      |
|  |  | SLC7A11 | PDK4               | PDHA1      |
|  |  | FTMT    | CircPVT1           | AR         |
|  |  | PARP1   | MIR9-3HG           | SMAD3      |
|  |  | PARP2   | ADIPOQ             | TPH1       |
|  |  | PARP3   | circDTL            | CCND1      |
|  |  | PARP4   | mmu_circRNA_000309 | CYP27A1    |
|  |  | PARP6   | PTPN18             | CDK5       |
|  |  | PARP8   | ABCC5              | TRR-TCT2-1 |
|  |  | PARP9   | CISD3              | SGK1       |
|  |  | PARP10  | MS4A15             | KCNQ1OT1   |
|  |  | PARP11  | FURIN              | CHEK1      |
|  |  | PARP12  | circRHBG           | RAD51      |
|  |  | PARP14  | GALNT14            | DSPP       |
|  |  | PARP15  | KLHDC3             |            |
|  |  | PARP16  | LINC01833          |            |
|  |  | PDSS2   | circGFRA1          |            |
|  |  | TXN     |                    |            |
|  |  | SENP1   |                    |            |
|  |  | PLA2G6  |                    |            |

|  |  |              |  |  |
|--|--|--------------|--|--|
|  |  | OIP5-AS1     |  |  |
|  |  | MIR190A      |  |  |
|  |  | FGF21        |  |  |
|  |  | CREB1        |  |  |
|  |  | CREB3        |  |  |
|  |  | CREB5        |  |  |
|  |  | FTMT         |  |  |
|  |  | GOT1         |  |  |
|  |  | TFRC         |  |  |
|  |  | GPX4         |  |  |
|  |  | MIR130B      |  |  |
|  |  | BEX1         |  |  |
|  |  | ASAH2        |  |  |
|  |  | SCD          |  |  |
|  |  | FABP4        |  |  |
|  |  | AKT1S1       |  |  |
|  |  | MLST8        |  |  |
|  |  | MTOR         |  |  |
|  |  | RPTOR        |  |  |
|  |  | CDH1         |  |  |
|  |  | SIRT1        |  |  |
|  |  | TYRO3        |  |  |
|  |  | SIRT6        |  |  |
|  |  | TMSB4X       |  |  |
|  |  | TMSB4Y       |  |  |
|  |  | KIF20A       |  |  |
|  |  | ECH1         |  |  |
|  |  | circRHOT1    |  |  |
|  |  | ETV4         |  |  |
|  |  | MEG8         |  |  |
|  |  | VCP          |  |  |
|  |  | circ_0007142 |  |  |
|  |  | ENPP2        |  |  |
|  |  | RBMS1        |  |  |
|  |  | KDM4A        |  |  |
|  |  | CBS          |  |  |
|  |  | MGST1        |  |  |
|  |  | circKIF4A    |  |  |
|  |  | miR-7-5p     |  |  |
|  |  | PRDX6        |  |  |
|  |  | circ_0067934 |  |  |
|  |  | MPC1         |  |  |
|  |  | CHMP1A       |  |  |

|  |  |             |  |  |
|--|--|-------------|--|--|
|  |  | CAMKK2      |  |  |
|  |  | SOX2        |  |  |
|  |  | SRSF9       |  |  |
|  |  | PROK2       |  |  |
|  |  | MIR4443     |  |  |
|  |  | SIRT2       |  |  |
|  |  | circRNA1615 |  |  |
|  |  | MIR27A      |  |  |
|  |  | MIR670      |  |  |
|  |  | MEF2C       |  |  |
|  |  | NF2         |  |  |
|  |  | CDH1        |  |  |
|  |  | HSPB1       |  |  |
|  |  | EZH2        |  |  |
|  |  | PEDS1       |  |  |
|  |  | SMPD1       |  |  |
|  |  | ADAMTS13    |  |  |
|  |  | CDC25A      |  |  |
|  |  | G6PD        |  |  |
|  |  | SFRS9       |  |  |
|  |  | CAV         |  |  |
|  |  | CircFNDC3B  |  |  |
|  |  | PPARD       |  |  |
|  |  | CISD2       |  |  |
|  |  | ENO3        |  |  |
|  |  | SESN2       |  |  |
|  |  | LCN2        |  |  |
|  |  | MARCHF5     |  |  |

**Supplementary Table S2.** Model performance correlation index. AUC (Area under the curve)

| <b>Dataset</b> | <b>AUC</b> | <b>Precision</b> | <b>Recall</b> | <b>F1-Score</b> |
|----------------|------------|------------------|---------------|-----------------|
| GSE100927      | 97.30%     | 96.10%           | 96.50%        | 97.10%          |
| GSE57691       | 79.20%     | 79.50%           | 78.30%        | 78.60%          |
| GSE28829       | 82.70%     | 81.70%           | 80.80%        | 81.30%          |
| GSE43292       | 78.90%     | 78.50%           | 78.40%        | 78.30%          |

**Supplementary Table S3.** List of marker genes for subgroup annotation. P val: p-value; Avg

log2FC: Average log2 Fold Change; Pct.1: Percentage of cells expressing in cluster 1; Pct.2:

Percentage of cells expressing in cluster 2; P\_val\_adj: Adjusted p-value.

| <b>Gene</b> | <b>P val</b>             | <b>Avg log2FC</b>    | <b>Pct .1</b> | <b>Pct.2</b> | <b>P_val_adj</b>         | <b>Cluster</b> |
|-------------|--------------------------|----------------------|---------------|--------------|--------------------------|----------------|
| CD27        | 4.7414903088<br>0579e-82 | 4.4894486<br>0446692 | 0.5<br>19     | 0.0<br>32    | 6.877531692<br>9228e-78  | B cell         |
| SLC38A5     | 5.1505637709<br>6834e-19 | 4.5398117<br>8212171 | 0.1<br>48     | 0.0<br>12    | 7.470892749<br>78957e-15 | B cell         |
| LY9         | 4.1091980123<br>7344e-41 | 4.5628981<br>4807574 | 0.2<br>41     | 0.0<br>14    | 5.960391716<br>94768e-37 | B cell         |
| CD24        | 4.3407042198<br>8813e-28 | 4.6588151<br>3942786 | 0.1<br>85     | 0.0<br>12    | 6.296191470<br>94774e-24 | B cell         |
| CD38        | 1.3109896662<br>7885e-42 | 4.6688356<br>5011193 | 0.2<br>59     | 0.0<br>15    | 1.901590510<br>93747e-38 | B cell         |
| XBP1        | 1.3268322081<br>0009e-06 | 4.6840019<br>7818973 | 0.6<br>48     | 0.5<br>24    | 0.019245701<br>1784918   | B cell         |
| NEB         | 3.0553447148<br>7194e-23 | 4.7322777<br>0730421 | 0.1<br>3      | 0.0<br>07    | 4.431777508<br>92175e-19 | B cell         |
| BRSK1       | 3.4582992077<br>1619e-06 | 4.7598355<br>6035419 | 0.1<br>11     | 0.0<br>21    | 0.050162630<br>0079234   | B cell         |
| FCRLB       | 3.2521357193<br>0583e-11 | 4.8696781<br>9079601 | 0.1<br>11     | 0.0<br>12    | 4.717222860<br>85311e-07 | B cell         |
| AC023590.1  | 1.5827632960<br>292e-34  | 4.8792381<br>9779583 | 0.1<br>48     | 0.0<br>06    | 2.295798160<br>89036e-30 | B cell         |
| IRF4        | 6.6812438817<br>9356e-35 | 4.9106176<br>2501284 | 0.2<br>41     | 0.0<br>16    | 9.691144250<br>54156e-31 | B cell         |
| CPNE5       | 2.1768480618<br>3738e-20 | 4.9785631<br>4558351 | 0.2<br>22     | 0.0<br>24    | 3.157518113<br>69512e-16 | B cell         |
| CLECL1      | 1.2043549456<br>8387e-19 | 5.0014869<br>0181652 | 0.1<br>3      | 0.0<br>09    | 1.746916848<br>71446e-15 | B cell         |
| RALGPS2     | 1.8389920658<br>1976e-71 | 5.0031051<br>9368869 | 0.5<br>56     | 0.0<br>44    | 2.667457991<br>47157e-67 | B cell         |
| E2F5        | 1.1089851590<br>4434e-29 | 5.0428453<br>0902253 | 0.1<br>48     | 0.0<br>07    | 1.608582973<br>19381e-25 | B cell         |
| BCL11A1     | 9.3782141299<br>5082e-48 | 5.2366721<br>0257936 | 0.3<br>52     | 0.0<br>26    | 1.360309959<br>54937e-43 | B cell         |
| PAIP2B      | 6.7576126223<br>9043e-28 | 5.3264681<br>9687733 | 0.3<br>15     | 0.0<br>36    | 9.801917108<br>77732e-24 | B cell         |
| LINC01857   | 7.7400479696<br>5776e-21 | 5.4615459<br>3907739 | 0.1<br>48     | 0.0<br>11    | 1.122693957<br>99886e-16 | B cell         |

|               |                           |                      |           |           |                           |        |
|---------------|---------------------------|----------------------|-----------|-----------|---------------------------|--------|
| GNB3          | 4.1075340795<br>5865e-29  | 5.5805465<br>9961912 | 0.1<br>85 | 0.0<br>12 | 5.957978182<br>39982e-25  | B cell |
| LINC00<br>309 | 2.4357129598<br>44e-20    | 5.7544996<br>5820223 | 0.1<br>3  | 0.0<br>08 | 3.533001648<br>25372e-16  | B cell |
| FKBP11        | 1.5545024641<br>3513e-17  | 5.8913290<br>8563885 | 0.4<br>81 | 0.1<br>36 | 2.254805824<br>228e-13    | B cell |
| TSPAN<br>13   | 1.9952762365<br>3197e-76  | 5.9474663<br>7783144 | 0.3<br>7  | 0.0<br>17 | 2.894148181<br>08962e-72  | B cell |
| CD79B         | 1.0980808219<br>8822e-104 | 6.0365518<br>2699989 | 0.6<br>3  | 0.0<br>39 | 1.592766232<br>29392e-100 | B cell |
| SPAG4         | 2.2710826005<br>5636e-74  | 6.2755476<br>5795206 | 0.3<br>15 | 0.0<br>13 | 3.294205312<br>107e-70    | B cell |
| LINC00<br>926 | 1.8911272091<br>4141e-58  | 6.6716939<br>9860641 | 0.2<br>78 | 0.0<br>13 | 2.743080016<br>85961e-54  | B cell |
| GZMB          | 7.7841833726<br>1829e-116 | 6.8184546<br>0288651 | 0.3<br>89 | 0.0<br>12 | 1.129095798<br>19828e-111 | B cell |
| PIM2          | 1.0480240225<br>247e-54   | 6.8510748<br>1956722 | 0.4<br>44 | 0.0<br>37 | 1.520158844<br>67208e-50  | B cell |
| HLA-<br>DOB   | 1.8040645824<br>7361e-106 | 7.0143807<br>3033472 | 0.3<br>15 | 0.0<br>08 | 2.616795676<br>87798e-102 | B cell |
| BANK1         | 6.4814501684<br>1807e-169 | 7.1205864<br>6144343 | 0.4<br>44 | 0.0<br>1  | 9.401343469<br>29041e-165 | B cell |
| DERL3         | 3.7487336104<br>54e-182   | 9.6265063<br>7478606 | 0.6<br>67 | 0.0<br>23 | 5.437538101<br>96353e-178 | B cell |
| GPRC5<br>B    | 0                         | 4.6983129<br>6492104 | 0.6<br>28 | 0.0<br>4  | 0                         | EC1    |
| RAMP2         | 0                         | 4.7193264<br>9388064 | 0.9<br>95 | 0.0<br>82 | 0                         | EC1    |
| PLLP          | 0                         | 4.7381040<br>1047726 | 0.4<br>89 | 0.0<br>28 | 0                         | EC1    |
| NOS3          | 0                         | 4.7815124<br>6835765 | 0.5<br>44 | 0.0<br>27 | 0                         | EC1    |
| KCNJ12        | 7.3551980316<br>6651e-67  | 4.7927887<br>4051104 | 0.1<br>07 | 0.0<br>06 | 1.066871474<br>49323e-62  | EC1    |
| TSPAN<br>1    | 5.2884665753<br>3045e-83  | 4.8361972<br>8674041 | 0.1<br>31 | 0.0<br>07 | 7.670920767<br>51682e-79  | EC1    |
| FBLN21        | 0                         | 4.8560835<br>6435269 | 0.8<br>52 | 0.0<br>78 | 0                         | EC1    |
| GRB14         | 4.9522570188<br>1424e-158 | 4.8586982<br>8048886 | 0.2<br>4  | 0.0<br>12 | 7.183248805<br>79006e-154 | EC1    |
| ST8SIA<br>61  | 0                         | 4.9258783<br>3095417 | 0.5<br>3  | 0.0<br>24 | 0                         | EC1    |
| MPZL2         | 0                         | 4.9304170<br>600063  | 0.9<br>78 | 0.0<br>69 | 0                         | EC1    |

|                |                           |                      |           |           |                           |     |
|----------------|---------------------------|----------------------|-----------|-----------|---------------------------|-----|
| PTPRB          | 0                         | 5.0240462<br>0295896 | 0.9<br>67 | 0.0<br>61 | 0                         | EC1 |
| PTPRR          | 1.4183552548<br>0724e-110 | 5.0830802<br>0162578 | 0.1<br>37 | 0.0<br>04 | 2.057324297<br>0979e-106  | EC1 |
| LINC01<br>133  | 6.9042904327<br>8168e-250 | 5.1125281<br>5683148 | 0.3<br>93 | 0.0<br>22 | 1.001467327<br>27498e-245 | EC1 |
| SEMA3<br>F     | 0                         | 5.1513428<br>7055935 | 0.8<br>33 | 0.0<br>58 | 0                         | EC1 |
| CDH23          | 3.0726339788<br>8802e-304 | 5.2050555<br>9149547 | 0.4<br>4  | 0.0<br>21 | 4.456855586<br>37708e-300 | EC1 |
| FAM107<br>A    | 0                         | 5.2435570<br>9225965 | 0.5<br>87 | 0.0<br>26 | 0                         | EC1 |
| CPAMD<br>8     | 0                         | 5.2498478<br>852794  | 0.7<br>08 | 0.0<br>4  | 0                         | EC1 |
| HYAL1          | 2.8324682895<br>6941e-250 | 5.3996351<br>3235586 | 0.3<br>03 | 0.0<br>09 | 4.108495254<br>02044e-246 | EC1 |
| AC0045<br>40.2 | 0                         | 5.4213249<br>7658257 | 0.5<br>77 | 0.0<br>18 | 0                         | EC1 |
| KIF26A         | 0                         | 5.4440964<br>142288  | 0.3<br>99 | 0.0<br>13 | 0                         | EC1 |
| ARFGE<br>F3    | 2.6784297769<br>3066e-173 | 5.4489922<br>6358307 | 0.2<br>19 | 0.0<br>07 | 3.885062391<br>43792e-169 | EC1 |
| ALDH3<br>A1    | 5.1955128398<br>9372e-124 | 5.4573075<br>7732089 | 0.1<br>53 | 0.0<br>05 | 7.536091374<br>26584e-120 | EC1 |
| FGF18          | 0                         | 5.5738663<br>8685177 | 0.6<br>58 | 0.0<br>25 | 0                         | EC1 |
| F5             | 0                         | 6.0291723<br>9038843 | 0.6<br>97 | 0.0<br>22 | 0                         | EC1 |
| AL3555<br>96.1 | 0                         | 6.1098745<br>819704  | 0.4<br>86 | 0.0<br>12 | 0                         | EC1 |
| PCDH1<br>7     | 0                         | 6.2055070<br>2348608 | 0.8<br>44 | 0.0<br>37 | 0                         | EC1 |
| CLDN5          | 0                         | 6.2195776<br>7202863 | 0.9<br>18 | 0.0<br>33 | 0                         | EC1 |
| DKK2           | 0                         | 6.8015516<br>0756091 | 0.8<br>47 | 0.0<br>21 | 0                         | EC1 |
| ITLN1          | 0                         | 6.8674987<br>4003712 | 0.9<br>73 | 0.1<br>08 | 0                         | EC1 |
| SSTR1          | 0                         | 7.3319964<br>1874552 | 0.4<br>29 | 0.0<br>05 | 0                         | EC1 |
| SLC16A<br>51   | 4.4009843160<br>5539e-178 | 3.8430274<br>6784256 | 0.5<br>02 | 0.0<br>45 | 6.383627750<br>43834e-174 | EC2 |
| RIMS4          | 2.6282419369<br>8781e-61  | 3.8588735<br>7021553 | 0.1<br>34 | 0.0<br>08 | 3.812264929<br>60081e-57  | EC2 |

|                 |                           |                      |           |           |                           |     |
|-----------------|---------------------------|----------------------|-----------|-----------|---------------------------|-----|
| SLCO2<br>A11    | 3.4356895923<br>9074e-164 | 3.9085992<br>1981859 | 0.3<br>94 | 0.0<br>28 | 4.983467753<br>76277e-160 | EC2 |
| ACSM3           | 3.9810529279<br>4601e-50  | 3.9481176<br>1609621 | 0.1<br>95 | 0.0<br>24 | 5.774517271<br>98569e-46  | EC2 |
| NPAS2           | 6.1175243771<br>9074e-50  | 3.9980341<br>7417372 | 0.1<br>47 | 0.0<br>13 | 8.873469109<br>11517e-46  | EC2 |
| PLA1A           | 1.4857721179<br>1175e-64  | 3.9990098<br>6255475 | 0.1<br>86 | 0.0<br>16 | 2.155112457<br>03099e-60  | EC2 |
| VWF1            | 4.6917961808<br>8135e-294 | 4.0188962<br>8148667 | 1         | 0.1<br>41 | 6.805450360<br>3684e-290  | EC2 |
| ESM11           | 1.2853918318<br>5998e-167 | 4.0291505<br>1027615 | 0.3<br>64 | 0.0<br>22 | 1.864460852<br>11291e-163 | EC2 |
| GDF71           | 2.2017408667<br>6193e-189 | 4.0727599<br>1955635 | 0.7<br>32 | 0.1<br>12 | 3.193625127<br>23818e-185 | EC2 |
| ALDH1<br>A31    | 2.3815105961<br>9006e-250 | 4.1197510<br>7372138 | 0.4<br>94 | 0.0<br>26 | 3.454381119<br>77369e-246 | EC2 |
| ABCA8<br>1      | 2.9595352776<br>7618e-186 | 4.1283622<br>8193489 | 0.4<br>03 | 0.0<br>25 | 4.292805920<br>2693e-182  | EC2 |
| CRTAC<br>11     | 0                         | 4.1307071<br>2015985 | 0.9<br>39 | 0.0<br>96 | 0                         | EC2 |
| BMX1            | 0                         | 4.2051435<br>9315972 | 0.9<br>26 | 0.0<br>61 | 0                         | EC2 |
| PLCXD<br>3      | 2.0180105367<br>0184e-159 | 4.3633479<br>8230904 | 0.3<br>55 | 0.0<br>23 | 2.927124283<br>48602e-155 | EC2 |
| MDFI            | 5.9596347805<br>1427e-121 | 4.4353087<br>0063897 | 0.2<br>38 | 0.0<br>13 | 8.644450249<br>13595e-117 | EC2 |
| OTC1            | 2.8151187202<br>2728e-122 | 4.4419264<br>1508716 | 0.2<br>25 | 0.0<br>11 | 4.083329703<br>68967e-118 | EC2 |
| CCL23           | 5.4390379073<br>855e-51   | 4.4576286<br>7695471 | 0.1<br>17 | 0.0<br>08 | 7.889324484<br>66266e-47  | EC2 |
| BMPER           | 5.1702075965<br>1977e-72  | 4.4911114<br>4013145 | 0.1<br>47 | 0.0<br>08 | 7.499386118<br>75193e-68  | EC2 |
| POU4F<br>11     | 1.5342409579<br>3045e-95  | 4.5089570<br>880422  | 0.1<br>82 | 0.0<br>09 | 2.225416509<br>47811e-91  | EC2 |
| SLC26A<br>4-AS1 | 8.4887456836<br>1323e-61  | 4.5394543<br>6505241 | 0.1<br>39 | 0.0<br>09 | 1.231292561<br>4081e-56   | EC2 |
| FAM43<br>A1     | 3.4011204164<br>7682e-237 | 4.5425954<br>5534509 | 0.5<br>54 | 0.0<br>4  | 4.933325164<br>09963e-233 | EC2 |
| HHIP-<br>AS12   | 9.8464925986<br>6446e-173 | 4.6322906<br>693057  | 0.3<br>25 | 0.0<br>16 | 1.428233751<br>43628e-168 | EC2 |
| BMP61           | 0                         | 4.8988624<br>1886862 | 0.7<br>4  | 0.0<br>34 | 0                         | EC2 |
| BMP41           | 0                         | 5.1754667<br>6857238 | 0.9<br>18 | 0.1       | 0                         | EC2 |

|               |                           |                      |           |           |                           |     |
|---------------|---------------------------|----------------------|-----------|-----------|---------------------------|-----|
| EDN11         | 0                         | 5.4449095<br>6116713 | 0.9<br>48 | 0.0<br>67 | 0                         | EC2 |
| HMCN2<br>1    | 0                         | 5.6444439<br>397571  | 0.4<br>37 | 0.0<br>13 | 0                         | EC2 |
| ACKR1         | 1.3546256952<br>2282e-67  | 5.8432337<br>2730902 | 0.1<br>47 | 0.0<br>09 | 1.964884570<br>92069e-63  | EC2 |
| PKHD1<br>L11  | 2.7717909965<br>9901e-289 | 6.1162578<br>8976019 | 0.3<br>2  | 0.0<br>05 | 4.020482840<br>56687e-285 | EC2 |
| GDF6          | 6.7683802767<br>073e-209  | 6.2131238<br>0100128 | 0.2<br>55 | 0.0<br>05 | 9.817535591<br>36394e-205 | EC2 |
| NRG1          | 0                         | 6.4067291<br>1274838 | 0.5<br>5  | 0.0<br>13 | 0                         | EC2 |
| NR2F11        | 1.3657675541<br>3388e-205 | 5.4160686<br>4376005 | 0.3<br>73 | 0.0<br>13 | 1.981045837<br>27119e-201 | EC3 |
| CRHBP         | 1.1003434423<br>7069e-119 | 5.4487024<br>3260375 | 0.3<br>8  | 0.0<br>3  | 1.596048163<br>15869e-115 | EC3 |
| LINC01<br>985 | 6.7666165042<br>2118e-120 | 5.4488225<br>9585401 | 0.1<br>99 | 0.0<br>06 | 9.814977239<br>37283e-116 | EC3 |
| KANK3<br>2    | 0                         | 5.4799477<br>6197936 | 0.7<br>59 | 0.0<br>36 | 0                         | EC3 |
| ADGRL<br>42   | 0                         | 5.5324717<br>6454389 | 0.9<br>28 | 0.0<br>53 | 0                         | EC3 |
| DOC2B<br>1    | 1.7997124290<br>8407e-159 | 5.6035187<br>6619731 | 0.2<br>59 | 0.0<br>07 | 2.610482878<br>38644e-155 | EC3 |
| CCL141        | 0                         | 5.7281508<br>2219995 | 0.5<br>9  | 0.0<br>18 | 0                         | EC3 |
| EXOC3<br>L1   | 1.1913202046<br>8516e-148 | 5.7709297<br>3823011 | 0.2<br>35 | 0.0<br>06 | 1.728009956<br>89582e-144 | EC3 |
| SEMA3<br>A    | 1.6068887366<br>5432e-142 | 5.8058403<br>350728  | 0.2<br>59 | 0.0<br>09 | 2.330792112<br>51709e-138 | EC3 |
| ADM5          | 1.8589597559<br>9459e-93  | 5.8612426<br>962103  | 0.1<br>87 | 0.0<br>08 | 2.696421126<br>07016e-89  | EC3 |
| ADGRF<br>52   | 0                         | 5.9655790<br>7892035 | 0.8<br>55 | 0.0<br>25 | 0                         | EC3 |
| CXorf36<br>1  | 0                         | 5.9829965<br>7276046 | 0.4<br>46 | 0.0<br>06 | 0                         | EC3 |
| NOSTRI<br>N1  | 0                         | 6.0292989<br>135357  | 0.5<br>18 | 0.0<br>1  | 0                         | EC3 |
| C2CD4<br>B    | 1.8224712103<br>259e-65   | 6.0429538<br>6178946 | 0.1<br>27 | 0.0<br>05 | 2.643494490<br>57771e-61  | EC3 |
| FAM167<br>B1  | 0                         | 6.2727217<br>7257834 | 0.5<br>66 | 0.0<br>18 | 0                         | EC3 |
| EMCN1         | 0                         | 6.4413621<br>7593509 | 0.8<br>92 | 0.0<br>23 | 0                         | EC3 |

|               |                           |                      |           |           |                           |     |
|---------------|---------------------------|----------------------|-----------|-----------|---------------------------|-----|
| PDE2A         | 0                         | 6.5173074<br>8140008 | 0.4<br>52 | 0.0<br>1  | 0                         | EC3 |
| MEOX1         | 1.0510936744<br>6429e-141 | 6.6151151<br>3561285 | 0.1<br>51 | 0.0<br>02 | 1.524611374<br>81046e-137 | EC3 |
| TM4SF<br>181  | 0                         | 7.0081180<br>4437853 | 0.7<br>41 | 0.0<br>13 | 0                         | EC3 |
| ALPL          | 8.1150855070<br>0829e-132 | 7.0160708<br>2473567 | 0.1<br>39 | 0.0<br>01 | 1.177093152<br>79155e-127 | EC3 |
| SEMA6<br>A    | 0                         | 7.0536207<br>0321523 | 0.3<br>43 | 0.0<br>04 | 0                         | EC3 |
| HAGLR<br>OS   | 2.3943582124<br>6712e-195 | 7.1437270<br>0767902 | 0.1<br>99 | 0.0<br>02 | 3.473016587<br>18356e-191 | EC3 |
| TSHZ2         | 0                         | 7.2784926<br>8472268 | 0.4<br>64 | 0.0<br>04 | 0                         | EC3 |
| KDR           | 0                         | 7.5658316<br>5653446 | 0.6<br>08 | 0.0<br>07 | 0                         | EC3 |
| DNASE<br>1L31 | 0                         | 7.7702614<br>4211454 | 0.5<br>6  | 0.0<br>14 | 0                         | EC3 |
| FLT4          | 0                         | 7.8541970<br>7666183 | 0.4<br>46 | 0.0<br>04 | 0                         | EC3 |
| SELE          | 5.2338758221<br>2533e-306 | 8.5229216<br>9482935 | 0.2<br>59 | 0.0<br>01 | 7.591736879<br>99279e-302 | EC3 |
| LHX6          | 1.3054193230<br>5464e-187 | 8.7625685<br>261127  | 0.1<br>51 | 0         | 1.893510728<br>09075e-183 | EC3 |
| FABP4         | 0                         | 9.2698267<br>015242  | 0.4<br>34 | 0.0<br>06 | 0                         | EC3 |
| APLNR         | 0                         | 9.6402307<br>3653005 | 0.6<br>14 | 0.0<br>02 | 0                         | EC3 |
| TFPI23        | 4.2826203280<br>8046e-39  | 3.4583352<br>1571356 | 0.2<br>57 | 0.0<br>59 | 6.211940785<br>8807e-35   | FC  |
| OLFML<br>2A   | 3.3832252060<br>1638e-26  | 3.5087414<br>0205208 | 0.1<br>19 | 0.0<br>19 | 4.907368161<br>32676e-22  | FC  |
| TBX15         | 1.9464268613<br>1924e-39  | 3.5099157<br>4800312 | 0.1<br>16 | 0.0<br>12 | 2.823292162<br>34356e-35  | FC  |
| EPHA3         | 1.0843967102<br>9103e-85  | 3.5099881<br>5084271 | 0.2<br>24 | 0.0<br>2  | 1.572917428<br>27714e-81  | FC  |
| CD248         | 1.7911071981<br>8447e-44  | 3.5261310<br>9068936 | 0.1<br>53 | 0.0<br>19 | 2.598000990<br>96657e-40  | FC  |
| FOXS1<br>2    | 2.7313787320<br>1364e-142 | 3.5791492<br>563443  | 0.5<br>86 | 0.0<br>97 | 3.961864850<br>78578e-138 | FC  |
| HIC1          | 1.2881011711<br>7125e-62  | 3.7985127<br>3082475 | 0.1<br>98 | 0.0<br>22 | 1.868390748<br>7839e-58   | FC  |
| CCDC1<br>02B  | 2.1515685809<br>3939e-127 | 3.8300755<br>1306216 | 0.3<br>99 | 0.0<br>46 | 3.120850226<br>65259e-123 | FC  |

|                |                           |                      |           |           |                           |    |
|----------------|---------------------------|----------------------|-----------|-----------|---------------------------|----|
| STEAP<br>4     | 3.8825530092<br>9425e-54  | 3.8417294<br>9929876 | 0.1<br>79 | 0.0<br>21 | 5.631643139<br>98132e-50  | FC |
| ATP1B2         | 3.7038063448<br>3696e-58  | 3.8933816<br>3297004 | 0.1<br>72 | 0.0<br>18 | 5.372371103<br>18602e-54  | FC |
| OLFM2          | 2.6652229779<br>6338e-68  | 3.9474387<br>6546255 | 0.1<br>23 | 0.0<br>06 | 3.865905929<br>53589e-64  | FC |
| CABP1          | 4.8849393877<br>209e-41   | 4.0170669<br>6488205 | 0.1<br>01 | 0.0<br>08 | 7.085604581<br>88916e-37  | FC |
| MMP11          | 1.5592980604<br>3592e-37  | 4.0196233<br>3217118 | 0.1<br>46 | 0.0<br>2  | 2.261761836<br>6623e-33   | FC |
| LAMA3          | 2.0750263859<br>1961e-103 | 4.0664236<br>5825271 | 0.2<br>01 | 0.0<br>12 | 3.009825772<br>77639e-99  | FC |
| TRPC6          | 3.5660539723<br>931e-49   | 4.0912187<br>3667691 | 0.1<br>12 | 0.0<br>08 | 5.172561286<br>95619e-45  | FC |
| TPPP3          | 5.2578263577<br>6558e-153 | 4.1072199<br>9363644 | 0.3<br>84 | 0.0<br>33 | 7.626477131<br>93897e-149 | FC |
| CRISPL<br>D2   | 9.7377120952<br>9533e-73  | 4.1758390<br>5655286 | 0.1<br>75 | 0.0<br>14 | 1.412455139<br>42259e-68  | FC |
| GGT5           | 4.1894673023<br>4292e-233 | 4.1788669<br>9737881 | 0.5<br>63 | 0.0<br>49 | 6.076822322<br>04841e-229 | FC |
| AGT            | 1.3244267712<br>5865e-240 | 4.2608641<br>931556  | 0.6<br>08 | 0.0<br>56 | 1.921081031<br>71067e-236 | FC |
| ABCC9<br>1     | 2.9556003892<br>6634e-28  | 4.3073680<br>1242888 | 0.1<br>87 | 0.0<br>43 | 4.287098364<br>63083e-24  | FC |
| KRT18          | 1.2081420537<br>7713e-144 | 4.3525254<br>2105983 | 0.4<br>55 | 0.0<br>53 | 1.752410049<br>00373e-140 | FC |
| KRT16          | 5.8944556094<br>8238e-55  | 4.4183304<br>6946997 | 0.1<br>31 | 0.0<br>1  | 8.549907861<br>5542e-51   | FC |
| CRLF1          | 2.7978916683<br>5576e-153 | 4.4846773<br>9979148 | 0.2<br>87 | 0.0<br>16 | 4.058341864<br>95002e-149 | FC |
| AC0186<br>47.1 | 5.6609014729<br>988e-87   | 4.624274             | 0.1<br>53 | 0.0<br>08 | 8.211137586<br>58476e-83  | FC |
| BRINP1         | 1.4088727176<br>3844e-56  | 4.6315218<br>0712278 | 0.1<br>01 | 0.0<br>05 | 2.043569876<br>93456e-52  | FC |
| LINGO1         | 7.9510147994<br>9346e-60  | 4.6669476<br>7462108 | 0.1<br>08 | 0.0<br>06 | 1.153294696<br>66653e-55  | FC |
| DSP            | 1.2538467434<br>4432e-86  | 4.7265133<br>824625  | 0.1<br>34 | 0.0<br>05 | 1.818704701<br>36599e-82  | FC |
| COL5A<br>3     | 2.6440833066<br>7541e-83  | 4.7607532<br>8948933 | 0.1<br>42 | 0.0<br>07 | 3.835242836<br>33269e-79  | FC |
| COLEC<br>11    | 5.4667623879<br>9783e-143 | 5.3530097<br>1165522 | 0.2<br>24 | 0.0<br>09 | 7.929538843<br>79086e-139 | FC |
| GUCY1<br>A2    | 9.5674800860<br>957e-138  | 5.8221659<br>3133463 | 0.1<br>49 | 0.0<br>02 | 1.387762986<br>48818e-133 | FC |

|          |                       |                  |       |       |                       |            |
|----------|-----------------------|------------------|-------|-------|-----------------------|------------|
| CDKN2A2  | 2.60473739340585e-150 | 3.30535577732931 | 0.467 | 0.058 | 3.77817158913519e-146 | Fibroblast |
| ADAMTS1  | 3.24650359669936e-71  | 3.32578278789045 | 0.194 | 0.02  | 4.70905346701243e-67  | Fibroblast |
| PCOLCE3  | 4.65290045529698e-193 | 3.35351669003585 | 0.891 | 0.232 | 6.74903211040827e-189 | Fibroblast |
| CRLF11   | 3.01568721729708e-69  | 3.37241416395909 | 0.191 | 0.019 | 4.37425430868942e-65  | Fibroblast |
| LPAR4    | 1.27155387435701e-34  | 3.40022620563721 | 0.112 | 0.014 | 1.84438889475484e-30  | Fibroblast |
| GAP432   | 2.53410456830532e-163 | 3.41128625504674 | 0.398 | 0.036 | 3.67571867632686e-159 | Fibroblast |
| VCAM14   | 1.29057768892275e-124 | 3.41251052282752 | 0.609 | 0.13  | 1.87198293778245e-120 | Fibroblast |
| EPHA31   | 1.84949690826427e-65  | 3.41303800997915 | 0.188 | 0.02  | 2.68269526543733e-61  | Fibroblast |
| PYCR12   | 6.0984628362229e-90   | 3.47190926679001 | 0.227 | 0.021 | 8.84582034394132e-86  | Fibroblast |
| FNDC1    | 5.55355529097758e-81  | 3.47403632034737 | 0.23  | 0.025 | 8.05543194956298e-77  | Fibroblast |
| CFH5     | 1.82342800083677e-201 | 3.49941247622919 | 0.951 | 0.265 | 2.64488231521374e-197 | Fibroblast |
| POSTN4   | 1.77389149956874e-187 | 3.56808973753485 | 0.658 | 0.099 | 2.57302962012446e-183 | Fibroblast |
| TNC1     | 2.43319535281951e-99  | 3.6482826712787  | 0.391 | 0.063 | 3.5293498592647e-95   | Fibroblast |
| COL3A12  | 6.20194422130621e-129 | 3.65243955563689 | 0.914 | 0.411 | 8.99592009300466e-125 | Fibroblast |
| TMEM119  | 1.17897961773586e-72  | 3.72728573032115 | 0.194 | 0.019 | 1.71010993552587e-68  | Fibroblast |
| CGREF1   | 2.97639207724419e-69  | 3.73440689405764 | 0.148 | 0.011 | 4.3172567080427e-65   | Fibroblast |
| SFRP42   | 2.66952052806503e-103 | 3.81458082966288 | 0.615 | 0.162 | 3.87213952595832e-99  | Fibroblast |
| SFTA1P   | 4.18244723946298e-66  | 3.98655406406328 | 0.115 | 0.06  | 6.06663972084105e-62  | Fibroblast |
| STEAP41  | 4.45005330071197e-160 | 4.11230304870265 | 0.276 | 0.015 | 6.45480231268271e-156 | Fibroblast |
| FGF7     | 2.18268768377258e-213 | 4.13970370427305 | 0.507 | 0.046 | 3.16598848531213e-209 | Fibroblast |
| NTRK21   | 2.96265643123247e-122 | 4.19004544069791 | 0.329 | 0.034 | 4.29733315350269e-118 | Fibroblast |
| TNFAIP62 | 4.4536084340036e-159  | 4.23532338810106 | 0.326 | 0.023 | 6.45995903352222e-155 | Fibroblast |

|         |                           |                      |           |           |                           |            |
|---------|---------------------------|----------------------|-----------|-----------|---------------------------|------------|
| COL1A12 | 8.0520388089<br>4443e-175 | 4.2453673<br>7025726 | 0.8<br>88 | 0.2<br>81 | 1.167948229<br>23739e-170 | Fibroblast |
| MXRA51  | 3.1229804135<br>6868e-221 | 4.3053174<br>6346728 | 0.4<br>24 | 0.0<br>28 | 4.529883089<br>88136e-217 | Fibroblast |
| DCN1    | 3.7956559030<br>1452e-288 | 4.4907283<br>0444341 | 0.6<br>68 | 0.0<br>62 | 5.505598887<br>32256e-284 | Fibroblast |
| CRABP2  | 1.0709685098<br>5369e-104 | 4.5034321<br>8372962 | 0.2<br>99 | 0.0<br>33 | 1.553439823<br>54278e-100 | Fibroblast |
| CEMIP   | 2.4204026929<br>2057e-109 | 5.1086171<br>1205172 | 0.1<br>68 | 0.0<br>07 | 3.510794106<br>08129e-105 | Fibroblast |
| LUM1    | 0                         | 5.6372863<br>9678597 | 0.8<br>68 | 0.0<br>73 | 0                         | Fibroblast |
| SFRP2   | 0                         | 6.9920644<br>8429067 | 0.5<br>39 | 0.0<br>15 | 0                         | Fibroblast |
| COMP    | 2.0989124949<br>4228e-177 | 7.0268120<br>9624347 | 0.2<br>63 | 0.0<br>11 | 3.044472573<br>91378e-173 | Fibroblast |
| SLC45A3 | 0                         | 6.5818945<br>9719376 | 0.5       | 0.0<br>13 | 0                         | MAST       |
| STXBP6  | 0                         | 6.6280596<br>8498412 | 0.5<br>89 | 0.0<br>13 | 0                         | MAST       |
| DHRS9   | 0                         | 6.7229783<br>2438925 | 0.5<br>73 | 0.0<br>13 | 0                         | MAST       |
| PAQR5   | 1.3789913412<br>7794e-146 | 6.8500027<br>1748828 | 0.1<br>72 | 0.0<br>03 | 2.000226940<br>52365e-142 | MAST       |
| LIF     | 2.8787472815<br>2227e-214 | 6.9859597<br>5808274 | 0.2<br>5  | 0.0<br>04 | 4.175622931<br>84805e-210 | MAST       |
| CDK15   | 0                         | 7.5928939<br>0011798 | 0.4<br>01 | 0.0<br>05 | 0                         | MAST       |
| RAB27B  | 0                         | 7.7129000<br>6702086 | 0.5<br>68 | 0.0<br>04 | 0                         | MAST       |
| HPGD    | 0                         | 7.8079508<br>0547514 | 0.6<br>93 | 0.0<br>12 | 0                         | MAST       |
| RGS13   | 0                         | 7.8767203<br>7342687 | 0.8<br>49 | 0.0<br>17 | 0                         | MAST       |
| EFHC2   | 9.1743541337<br>4562e-146 | 7.8805475<br>9441718 | 0.1<br>35 | 0.0<br>01 | 1.330740067<br>0998e-141  | MAST       |
| MYB     | 3.8434839134<br>4004e-237 | 7.9495728<br>8637411 | 0.2<br>24 | 0.0<br>02 | 5.574973416<br>44478e-233 | MAST       |
| NTM     | 0                         | 8.5793079<br>504017  | 0.4<br>32 | 0.0<br>04 | 0                         | MAST       |
| KCNH2   | 0                         | 9.0287506<br>290663  | 0.2<br>71 | 0.0<br>01 | 0                         | MAST       |
| KIT     | 0                         | 9.6771554<br>9210654 | 0.9<br>32 | 0.0<br>08 | 0                         | MAST       |

|                |                           |                      |           |           |                           |                 |
|----------------|---------------------------|----------------------|-----------|-----------|---------------------------|-----------------|
| AL1578<br>95.1 | 0                         | 9.8432564<br>9086853 | 0.6<br>3  | 0.0<br>02 | 0                         | MAST            |
| MLPH           | 0                         | 9.9512488<br>4400434 | 0.7<br>08 | 0.0<br>02 | 0                         | MAST            |
| NTRK1          | 3.2385352317<br>9932e-269 | 9.9651715<br>6862342 | 0.2<br>19 | 0         | 4.697495353<br>72491e-265 | MAST            |
| RHEX           | 0                         | 10.384210<br>6315859 | 0.8<br>8  | 0.0<br>03 | 0                         | MAST            |
| GCSAM<br>L     | 0                         | 10.645775<br>0054244 | 0.3<br>33 | 0.0<br>01 | 0                         | MAST            |
| TPSD1          | 0                         | 10.931250<br>7629868 | 0.4<br>17 | 0         | 0                         | MAST            |
| MS4A2          | 0                         | 11.530237<br>3350912 | 0.9<br>9  | 0.0<br>03 | 0                         | MAST            |
| SLC18A<br>2    | 0                         | 11.632651<br>4552631 | 0.9<br>06 | 0.0<br>01 | 0                         | MAST            |
| HDC            | 0                         | 11.700025<br>4449286 | 0.9<br>32 | 0.0<br>01 | 0                         | MAST            |
| IL1RL1         | 0                         | 11.958398<br>2795043 | 0.6<br>72 | 0.0<br>01 | 0                         | MAST            |
| TPSAB<br>1     | 0                         | 12.210313<br>404753  | 1         | 0.0<br>06 | 0                         | MAST            |
| CPA3           | 0                         | 12.369481<br>4215461 | 0.9<br>95 | 0.0<br>02 | 0                         | MAST            |
| CTSG           | 0                         | 12.492674<br>1387605 | 0.5       | 0.0<br>02 | 0                         | MAST            |
| AL7315<br>57.1 | 0                         | 12.592398<br>6836747 | 0.3<br>54 | 0         | 0                         | MAST            |
| TPSB2          | 0                         | 12.751114<br>4298823 | 1         | 0.0<br>1  | 0                         | MAST            |
| CALB2          | 0                         | 13.216081<br>0060775 | 0.6<br>88 | 0         | 0                         | MAST            |
| FOLR2          | 0                         | 4.8563325<br>9171034 | 0.9<br>29 | 0.0<br>53 | 0                         | Macrop<br>hage1 |
| MS4A7          | 0                         | 4.8814993<br>8762327 | 0.9<br>87 | 0.0<br>87 | 0                         | Macrop<br>hage1 |
| TRPV4          | 2.1731877231<br>6207e-165 | 4.8954176<br>3443618 | 0.1<br>76 | 0.0<br>05 | 3.152208792<br>44659e-161 | Macrop<br>hage1 |
| ADAP2          | 0                         | 4.9068625<br>8349815 | 0.8<br>8  | 0.0<br>54 | 0                         | Macrop<br>hage1 |
| C3             | 0                         | 4.9108289<br>7594901 | 0.6<br>33 | 0.0<br>48 | 0                         | Macrop<br>hage1 |
| ACSM5          | 2.1013444064<br>7157e-162 | 4.9467649<br>1030766 | 0.1<br>77 | 0.0<br>06 | 3.048000061<br>58701e-158 | Macrop<br>hage1 |

|                |                           |                      |           |           |                           |                 |
|----------------|---------------------------|----------------------|-----------|-----------|---------------------------|-----------------|
| SIGLEC 1       | 0                         | 4.9630225<br>2811127 | 0.4<br>83 | 0.0<br>18 | 0                         | Macrop<br>hage1 |
| C2             | 0                         | 4.9948804<br>8450896 | 0.5<br>92 | 0.0<br>22 | 0                         | Macrop<br>hage1 |
| IGF1           | 0                         | 5.0187477<br>7715001 | 0.6<br>37 | 0.0<br>21 | 0                         | Macrop<br>hage1 |
| EBI3           | 0                         | 5.0548631<br>4757336 | 0.5<br>12 | 0.0<br>14 | 0                         | Macrop<br>hage1 |
| SLC16A<br>10   | 0                         | 5.0759935<br>3690038 | 0.4<br>45 | 0.0<br>22 | 0                         | Macrop<br>hage1 |
| GAS2L3         | 0                         | 5.1062232<br>0645251 | 0.3<br>48 | 0.0<br>12 | 0                         | Macrop<br>hage1 |
| CCL3           | 0                         | 5.1327751<br>2028309 | 0.7<br>29 | 0.0<br>57 | 0                         | Macrop<br>hage1 |
| IGSF21         | 0                         | 5.1459347<br>4589687 | 0.7<br>21 | 0.0<br>23 | 0                         | Macrop<br>hage1 |
| SLCO2<br>B1    | 0                         | 5.1916861<br>327542  | 0.9<br>61 | 0.0<br>77 | 0                         | Macrop<br>hage1 |
| PROX1          | 1.4617570286<br>9999e-148 | 5.2099991<br>1709014 | 0.1<br>56 | 0.0<br>04 | 2.120278570<br>12934e-144 | Macrop<br>hage1 |
| CLDN1          | 1.2944647376<br>9014e-257 | 5.2564419<br>9842807 | 0.2<br>77 | 0.0<br>09 | 1.877621102<br>01955e-253 | Macrop<br>hage1 |
| SLC2A5         | 3.1549168939<br>3386e-225 | 5.4016114<br>9764759 | 0.2<br>23 | 0.0<br>04 | 4.576206954<br>65106e-221 | Macrop<br>hage1 |
| SLC1A3         | 0                         | 5.4042745<br>7108767 | 0.4<br>08 | 0.0<br>1  | 0                         | Macrop<br>hage1 |
| CH25H          | 4.8029094025<br>3447e-302 | 5.4209039<br>9544246 | 0.3<br>43 | 0.0<br>15 | 6.966620088<br>37625e-298 | Macrop<br>hage1 |
| KCNQ3          | 1.1940038398<br>1627e-200 | 5.4480524<br>0551261 | 0.2<br>01 | 0.0<br>04 | 1.731902569<br>6535e-196  | Macrop<br>hage1 |
| CCL13          | 1.6663260118<br>2863e-173 | 5.5902695<br>9352506 | 0.1<br>85 | 0.0<br>06 | 2.417005880<br>15743e-169 | Macrop<br>hage1 |
| IL2RA          | 0                         | 5.6048973<br>8940084 | 0.4<br>78 | 0.0<br>09 | 0                         | Macrop<br>hage1 |
| LILRB5         | 0                         | 5.7091006<br>102291  | 0.4<br>66 | 0.0<br>13 | 0                         | Macrop<br>hage1 |
| KCNJ5          | 0                         | 5.7133607<br>1361532 | 0.4<br>14 | 0.0<br>07 | 0                         | Macrop<br>hage1 |
| LINC02<br>345  | 2.1258772746<br>7139e-114 | 5.7763456<br>216175  | 0.1<br>13 | 0.0<br>02 | 3.083584986<br>91086e-110 | Macrop<br>hage1 |
| AP0034<br>81.1 | 1.1640580503<br>8034e-260 | 6.0150717<br>5227107 | 0.2<br>43 | 0.0<br>03 | 1.688466202<br>07669e-256 | Macrop<br>hage1 |
| CCL8           | 0                         | 6.2728062<br>5812684 | 0.3<br>74 | 0.0<br>12 | 0                         | Macrop<br>hage1 |

|                 |                           |                      |           |           |                           |                 |
|-----------------|---------------------------|----------------------|-----------|-----------|---------------------------|-----------------|
| CALCR           | 1.0425152611<br>7588e-179 | 6.5117020<br>344845  | 0.1<br>67 | 0.0<br>02 | 1.512168386<br>33562e-175 | Macrop<br>hage1 |
| FCGBP           | 0                         | 6.8160608<br>5404406 | 0.5<br>77 | 0.0<br>31 | 0                         | Macrop<br>hage1 |
| MYCL            | 1.5838720187<br>5286e-173 | 4.4372882<br>3885708 | 0.2<br>47 | 0.0<br>11 | 2.297406363<br>20102e-169 | Macrop<br>hage2 |
| S100Z           | 2.2126815896<br>4784e-114 | 4.4657507<br>2061533 | 0.1<br>45 | 0.0<br>05 | 3.209494645<br>78419e-110 | Macrop<br>hage2 |
| CCR2            | 8.9252860710<br>314e-295  | 4.4682006<br>5156398 | 0.3<br>42 | 0.0<br>09 | 1.294612744<br>6031e-290  | Macrop<br>hage2 |
| LINC00<br>877   | 7.7723130847<br>3201e-90  | 4.5389710<br>285208  | 0.1<br>15 | 0.0<br>04 | 1.127374012<br>94038e-85  | Macrop<br>hage2 |
| AL0343<br>97.3  | 3.1618104184<br>4668e-120 | 4.5559480<br>116643  | 0.1<br>78 | 0.0<br>08 | 4.586206011<br>95691e-116 | Macrop<br>hage2 |
| LUCAT<br>1      | 5.8502780668<br>6813e-138 | 4.5764443<br>059546  | 0.2<br>22 | 0.0<br>12 | 8.485828335<br>99222e-134 | Macrop<br>hage2 |
| LILRA1          | 1.7380147396<br>0848e-115 | 4.6336881<br>5682106 | 0.1<br>59 | 0.0<br>06 | 2.520990379<br>80211e-111 | Macrop<br>hage2 |
| C19orf3<br>8    | 4.5028664490<br>0856e-248 | 4.7988518<br>4232567 | 0.3<br>59 | 0.0<br>16 | 6.531407784<br>28692e-244 | Macrop<br>hage2 |
| C15orf4<br>81   | 0                         | 4.8588706<br>5699744 | 0.4<br>85 | 0.0<br>24 | 0                         | Macrop<br>hage2 |
| LILRA5          | 2.4436611896<br>3412e-226 | 5.3110324<br>2165766 | 0.2<br>9  | 0.0<br>1  | 3.544530555<br>56429e-222 | Macrop<br>hage2 |
| PRAM1           | 8.7236308388<br>302e-248  | 5.3470749<br>0293011 | 0.2<br>79 | 0.0<br>07 | 1.265362653<br>17232e-243 | Macrop<br>hage2 |
| MEFV            | 3.3554203851<br>4275e-80  | 5.3560906<br>0557342 | 0.1<br>01 | 0.0<br>03 | 4.867037268<br>64956e-76  | Macrop<br>hage2 |
| AC0206<br>56.11 | 0                         | 5.4019706<br>6926412 | 0.6<br>85 | 0.0<br>32 | 0                         | Macrop<br>hage2 |
| CSTA1           | 0                         | 5.4265380<br>6143486 | 0.8<br>25 | 0.0<br>4  | 0                         | Macrop<br>hage2 |
| FCER1<br>A1     | 3.3974429186<br>4706e-237 | 5.4794749<br>7348775 | 0.4<br>41 | 0.0<br>33 | 4.927990953<br>49756e-233 | Macrop<br>hage2 |
| LYZ1            | 0                         | 5.5614717<br>3040567 | 0.9<br>92 | 0.1<br>73 | 0                         | Macrop<br>hage2 |
| IL1R2           | 2.3898988892<br>0618e-125 | 5.8329987<br>2359813 | 0.1<br>56 | 0.0<br>05 | 3.466548338<br>79356e-121 | Macrop<br>hage2 |
| PKIB            | 0                         | 5.9638671<br>0199661 | 0.5<br>67 | 0.0<br>13 | 0                         | Macrop<br>hage2 |
| CFP             | 2.5212882026<br>6347e-297 | 6.0270196<br>2905459 | 0.3<br>18 | 0.0<br>06 | 3.657128537<br>96336e-293 | Macrop<br>hage2 |
| CD1D1           | 0                         | 6.0831851<br>3887082 | 0.4<br>58 | 0.0<br>09 | 0                         | Macrop<br>hage2 |

|               |                           |                      |           |           |                           |                 |
|---------------|---------------------------|----------------------|-----------|-----------|---------------------------|-----------------|
| CLEC10<br>A   | 0                         | 6.3733570<br>3000072 | 0.5<br>81 | 0.0<br>19 | 0                         | Macrop<br>hage2 |
| S100A9        | 2.4846851431<br>0448e-225 | 6.6151102<br>3683592 | 0.5<br>59 | 0.0<br>66 | 3.604035800<br>07305e-221 | Macrop<br>hage2 |
| CD300E        | 0                         | 6.8583712<br>9746769 | 0.3<br>42 | 0.0<br>04 | 0                         | Macrop<br>hage2 |
| RETN          | 6.8851233619<br>2949e-195 | 7.0707021<br>5425673 | 0.1<br>92 | 0.0<br>03 | 9.986871436<br>47872e-191 | Macrop<br>hage2 |
| EREG          | 1.9738313024<br>3946e-171 | 7.4417238<br>2889532 | 0.1<br>95 | 0.0<br>05 | 2.863042304<br>18844e-167 | Macrop<br>hage2 |
| LGALS2        | 0                         | 7.4495776<br>0352219 | 0.5<br>84 | 0.0<br>09 | 0                         | Macrop<br>hage2 |
| CD1C          | 0                         | 8.0803656<br>0554589 | 0.2<br>68 | 0.0<br>01 | 0                         | Macrop<br>hage2 |
| S100A8        | 1.2166445758<br>7516e-274 | 9.1588343<br>5828207 | 0.3<br>51 | 0.0<br>12 | 1.764742957<br>30692e-270 | Macrop<br>hage2 |
| FCN1          | 0                         | 9.5140772<br>0886252 | 0.3<br>92 | 0.0<br>02 | 0                         | Macrop<br>hage2 |
| S100A1<br>2   | 9.7666771906<br>5437e-176 | 10.420083<br>6751021 | 0.1<br>48 | 0.0<br>01 | 1.416656526<br>50442e-171 | Macrop<br>hage2 |
| C21           | 1.6801460787<br>5668e-22  | 2.8522966<br>9794438 | 0.4<br>15 | 0.1<br>02 | 2.437051887<br>23656e-18  | Macrop<br>hage3 |
| CR12          | 9.7800420867<br>1303e-05  | 2.8958688<br>6667212 | 0.1<br>59 | 0.0<br>61 | 1                         | Macrop<br>hage3 |
| QPRT3         | 7.5604421511<br>435e-05   | 2.9107915<br>8621868 | 0.1<br>46 | 0.0<br>53 | 1                         | Macrop<br>hage3 |
| TMEM1<br>76B3 | 2.8913557263<br>5219e-57  | 2.9572736<br>8359295 | 0.8<br>78 | 0.2<br>15 | 4.193911481<br>07385e-53  | Macrop<br>hage3 |
| SELEN<br>OP1  | 1.9413683221<br>818e-44   | 2.9667965<br>5154759 | 0.9<br>51 | 0.4<br>22 | 2.815954751<br>3247e-40   | Macrop<br>hage3 |
| PLTP1         | 1.8888161425<br>9971e-33  | 2.9967968<br>1179652 | 0.8<br>05 | 0.3<br>07 | 2.739727814<br>84088e-29  | Macrop<br>hage3 |
| FTL2          | 9.7978818698<br>0145e-45  | 3.0281462<br>0775209 | 1         | 0.9<br>91 | 1.421182765<br>2147e-40   | Macrop<br>hage3 |
| C1QB2         | 4.5292670580<br>3564e-80  | 3.0961877<br>4909604 | 1         | 0.2<br>11 | 6.569701867<br>6807e-76   | Macrop<br>hage3 |
| NPL2          | 2.2184755078<br>5736e-30  | 3.1505585<br>0503777 | 0.4<br>88 | 0.1<br>13 | 3.217898724<br>1471e-26   | Macrop<br>hage3 |
| HMOX1<br>2    | 9.0238777373<br>7319e-12  | 3.1680358<br>4558454 | 0.4<br>27 | 0.1<br>8  | 1.308913465<br>80598e-07  | Macrop<br>hage3 |
| SLC15A<br>32  | 6.6575756165<br>9632e-25  | 3.1739610<br>2640722 | 0.5<br>37 | 0.1<br>65 | 9.656813431<br>87296e-21  | Macrop<br>hage3 |
| RAB3IL<br>11  | 0.0022690913<br>5019086   | 3.1793224<br>3446475 | 0.1<br>34 | 0.0<br>6  | 1                         | Macrop<br>hage3 |

|              |                          |                      |           |           |                          |                 |
|--------------|--------------------------|----------------------|-----------|-----------|--------------------------|-----------------|
| FOLR21       | 1.9000519349<br>2204e-62 | 3.2102734<br>7899419 | 0.8<br>29 | 0.1<br>73 | 2.756025331<br>60441e-58 | Macrop<br>hage3 |
| CD2091       | 7.0192979792<br>3269e-20 | 3.2271062<br>4467944 | 0.3<br>41 | 0.0<br>79 | 1.018149171<br>8877e-15  | Macrop<br>hage3 |
| RNASE<br>14  | 6.9124937698<br>5487e-44 | 3.2668676<br>2743335 | 0.8<br>54 | 0.2<br>8  | 1.002657221<br>31745e-39 | Macrop<br>hage3 |
| C1QA2        | 7.3312258847<br>5548e-80 | 3.2750007<br>3842978 | 0.9<br>88 | 0.2<br>24 | 1.063394314<br>58378e-75 | Macrop<br>hage3 |
| ADORA<br>31  | 3.3039226276<br>534e-05  | 3.2832593<br>619867  | 0.1<br>22 | 0.0<br>37 | 0.479233977<br>141125    | Macrop<br>hage3 |
| SLC12A<br>51 | 4.4744923335<br>082e-06  | 3.4260499<br>9292626 | 0.1<br>34 | 0.0<br>39 | 0.064902511<br>2975364   | Macrop<br>hage3 |
| SCD1         | 1.1473745345<br>8911e-19 | 3.5537546<br>5916141 | 0.2<br>93 | 0.0<br>6  | 1.664266762<br>42151e-15 | Macrop<br>hage3 |
| ACP52        | 1.1384468643<br>5111e-19 | 3.5547874<br>2076384 | 0.3<br>54 | 0.0<br>85 | 1.651317176<br>74128e-15 | Macrop<br>hage3 |
| GAPLIN<br>C1 | 8.8708378494<br>0713e-07 | 3.6910423<br>6047678 | 0.1<br>22 | 0.0<br>3  | 0.012867150<br>300565    | Macrop<br>hage3 |
| F13A11       | 1.9784670574<br>9894e-47 | 3.8031577<br>143985  | 0.7<br>2  | 0.1<br>73 | 2.869766466<br>90221e-43 | Macrop<br>hage3 |
| CFD2         | 1.0733365884<br>338e-67  | 3.8777371<br>5021207 | 0.8<br>78 | 0.1<br>98 | 1.556874721<br>52323e-63 | Macrop<br>hage3 |
| TMIGD3<br>1  | 5.3674464636<br>9192e-10 | 3.9402183<br>2812092 | 0.1<br>22 | 0.0<br>21 | 7.785481095<br>58514e-06 | Macrop<br>hage3 |
| APOE2        | 9.5207556928<br>6811e-39 | 4.1678097<br>3247859 | 0.6<br>34 | 0.1<br>54 | 1.380985613<br>25052e-34 | Macrop<br>hage3 |
| OTOA1        | 2.3694650088<br>2304e-35 | 4.3420078<br>0659989 | 0.3<br>05 | 0.0<br>38 | 3.436908995<br>29782e-31 | Macrop<br>hage3 |
| TGFA1        | 8.6040634631<br>2839e-07 | 4.3561610<br>9457807 | 0.1<br>22 | 0.0<br>3  | 0.012480194<br>0532677   | Macrop<br>hage3 |
| HS3ST2       | 4.2140624168<br>99e-20   | 4.7633951<br>8569201 | 0.1<br>22 | 0.0<br>11 | 6.112497535<br>712e-16   | Macrop<br>hage3 |
| APOC1<br>1   | 4.3724521914<br>0857e-44 | 5.2861828<br>1435358 | 0.5<br>37 | 0.0<br>96 | 6.342241903<br>63812e-40 | Macrop<br>hage3 |
| CCL18        | 4.7965771887<br>1077e-34 | 5.6968267<br>0598877 | 0.1<br>71 | 0.0<br>12 | 6.957435212<br>22497e-30 | Macrop<br>hage3 |
| CRTAC<br>13  | 1.5982552107<br>524e-68  | 3.1149864<br>0584098 | 0.8<br>64 | 0.1<br>21 | 2.318269183<br>19636e-64 | Mesoth<br>elial |
| C3orf80      | 6.4709205642<br>1624e-14 | 3.1292928<br>7428066 | 0.1<br>19 | 0.0<br>11 | 9.386070278<br>39565e-10 | Mesoth<br>elial |
| BDNF2        | 1.0629963526<br>7019e-18 | 3.1615570<br>8328052 | 0.3<br>22 | 0.0<br>54 | 1.541876209<br>54811e-14 | Mesoth<br>elial |
| FOXD1        | 1.9436247954<br>3366e-15 | 3.1724391<br>5114248 | 0.1<br>53 | 0.0<br>16 | 2.819227765<br>77652e-11 | Mesoth<br>elial |

|            |                           |                      |           |           |                           |             |
|------------|---------------------------|----------------------|-----------|-----------|---------------------------|-------------|
| BMP63      | 2.3442309326<br>6972e-47  | 3.2095766<br>4365865 | 0.5<br>08 | 0.0<br>57 | 3.400306967<br>83743e-43  | Mesothelial |
| BCO21      | 1.1556145879<br>997e-46   | 3.3999820<br>7823853 | 0.3<br>9  | 0.0<br>34 | 1.676218959<br>89357e-42  | Mesothelial |
| AKR1C13    | 1.7785698948<br>1728e-44  | 3.4531535<br>5553364 | 0.7<br>63 | 0.1<br>45 | 2.579815632<br>43247e-40  | Mesothelial |
| SERPINE23  | 2.1114357402<br>9192e-33  | 3.4532931<br>9421319 | 0.5<br>25 | 0.0<br>86 | 3.062637541<br>29343e-29  | Mesothelial |
| LMO7-AS12  | 3.2801547237<br>3395e-44  | 3.4586352<br>8848516 | 0.3<br>73 | 0.0<br>32 | 4.757864426<br>7761e-40   | Mesothelial |
| PIR2       | 1.0700375857<br>7734e-41  | 3.4789450<br>725299  | 0.5<br>93 | 0.0<br>9  | 1.552089518<br>17003e-37  | Mesothelial |
| KCNK153    | 4.6924281979<br>3218e-43  | 3.5067617<br>8014523 | 0.5<br>93 | 0.0<br>9  | 6.806367101<br>10062e-39  | Mesothelial |
| RIMS41     | 4.0848730744<br>3463e-26  | 3.5876794<br>7212927 | 0.1<br>69 | 0.0<br>12 | 5.925108394<br>46743e-22  | Mesothelial |
| PAMR1      | 2.7787671181<br>0622e-32  | 3.6946122<br>7227842 | 0.2<br>2  | 0.0<br>16 | 4.030601704<br>81308e-28  | Mesothelial |
| RAMP33     | 5.6352446937<br>7334e-96  | 3.7758747<br>7101353 | 0.9<br>66 | 0.1<br>12 | 8.173922428<br>31824e-92  | Mesothelial |
| RAB381     | 3.3598521363<br>155e-75   | 3.8146790<br>5697251 | 0.5<br>93 | 0.0<br>5  | 4.873465523<br>72563e-71  | Mesothelial |
| ART42      | 3.8452566469<br>5611e-79  | 3.8171483<br>3836059 | 0.7<br>63 | 0.0<br>81 | 5.577544766<br>40984e-75  | Mesothelial |
| AC007920.2 | 2.2949799926<br>924e-22   | 3.8274287<br>5348032 | 0.1<br>19 | 0.0<br>07 | 3.328868479<br>40033e-18  | Mesothelial |
| PLCXD31    | 1.7914642979<br>8235e-85  | 3.8726955<br>0980416 | 0.5<br>08 | 0.0<br>31 | 2.598518964<br>22339e-81  | Mesothelial |
| SMOC11     | 1.3870185025<br>4941e-109 | 3.9672061<br>2903748 | 0.4<br>41 | 0.0<br>17 | 2.011870337<br>94792e-105 | Mesothelial |
| RAB3C2     | 2.5694351563<br>1784e-67  | 4.0096863<br>0724741 | 0.2<br>88 | 0.0<br>12 | 3.726965694<br>23903e-63  | Mesothelial |
| HHIP-AS13  | 9.1185002982<br>2609e-96  | 4.0184859<br>0611074 | 0.4<br>75 | 0.0<br>24 | 1.322638468<br>25769e-91  | Mesothelial |
| MELTF      | 7.0097490329<br>252e-35   | 4.1210423<br>8512823 | 0.2<br>71 | 0.0<br>22 | 1.016764097<br>2258e-30   | Mesothelial |
| TNFRSF11B2 | 1.3597425643<br>0945e-51  | 4.1611852<br>8302309 | 0.9<br>83 | 0.2<br>65 | 1.972306589<br>53085e-47  | Mesothelial |
| HTR2B1     | 5.6813456565<br>8436e-94  | 4.1869030<br>3003117 | 0.5<br>08 | 0.0<br>28 | 8.240791874<br>87561e-90  | Mesothelial |
| MASP12     | 6.6891852602<br>8431e-113 | 4.5151080<br>2101222 | 0.6<br>44 | 0.0<br>39 | 9.702663220<br>0424e-109  | Mesothelial |
| ABCA9      | 1.1644146714<br>4853e-64  | 4.6479475<br>5073817 | 0.2<br>54 | 0.0<br>1  | 1.688983480<br>93609e-60  | Mesothelial |

|               |                           |                      |           |           |                           |                 |
|---------------|---------------------------|----------------------|-----------|-----------|---------------------------|-----------------|
| SHISA3<br>1   | 2.5707416142<br>5984e-109 | 4.7269650<br>8550336 | 0.5<br>25 | 0.0<br>26 | 3.728860711<br>4839e-105  | Mesoth<br>elial |
| SFRP5         | 1.0851192927<br>4477e-118 | 6.2228157<br>4273475 | 0.2<br>71 | 0.0<br>05 | 1.573965534<br>1263e-114  | Mesoth<br>elial |
| ANKRD<br>13   | 3.5411010817<br>4212e-104 | 6.4082523<br>1688531 | 0.4<br>07 | 0.0<br>16 | 5.136367119<br>06694e-100 | Mesoth<br>elial |
| SGCG          | 0                         | 6.7342279<br>2285459 | 0.8<br>64 | 0.0<br>17 | 0                         | Mesoth<br>elial |
| SMPX1         | 1.6990295207<br>0847e-31  | 1.9627164<br>2011808 | 0.1<br>21 | 0.0<br>32 | 2.464442319<br>78764e-27  | SMC1            |
| SCARA<br>32   | 1.3053605287<br>981e-195  | 1.9639291<br>5093183 | 0.6<br>95 | 0.2<br>25 | 1.893425447<br>02164e-191 | SMC1            |
| GPC3          | 3.4942138130<br>8891e-77  | 1.9845717<br>6729062 | 0.2<br>11 | 0.0<br>42 | 5.068357135<br>88546e-73  | SMC1            |
| COL4A<br>4    | 1.9991342224<br>2898e-50  | 2.0118222<br>7449726 | 0.1<br>67 | 0.0<br>4  | 2.899744189<br>63323e-46  | SMC1            |
| MKX           | 1.4205184361<br>5684e-32  | 2.0612829<br>9314432 | 0.1<br>15 | 0.0<br>29 | 2.060461991<br>6455e-28   | SMC1            |
| MTUS2<br>2    | 9.8633350934<br>2427e-51  | 2.0649524<br>5475921 | 0.1<br>97 | 0.0<br>54 | 1.430676755<br>30119e-46  | SMC1            |
| CRISPL<br>D12 | 5.7455486493<br>8896e-223 | 2.1390613            | 0.7<br>33 | 0.2<br>38 | 8.333918315<br>93869e-219 | SMC1            |
| SLC14A<br>1   | 2.9535332810<br>5378e-126 | 2.1678298<br>0155448 | 0.3<br>37 | 0.0<br>69 | 4.284100024<br>16851e-122 | SMC1            |
| ISLR          | 1.2361339943<br>1672e-214 | 2.1755867<br>5467663 | 0.6<br>19 | 0.1<br>59 | 1.793012358<br>75641e-210 | SMC1            |
| TMEM1<br>301  | 9.4746352361<br>3313e-140 | 2.1782859<br>0963283 | 0.3<br>88 | 0.0<br>84 | 1.374295841<br>00111e-135 | SMC1            |
| GSG1L<br>2    | 3.3953061169<br>8781e-143 | 2.1825473<br>8998992 | 0.3<br>98 | 0.0<br>86 | 4.924891522<br>69081e-139 | SMC1            |
| SERPIN<br>E11 | 3.3514705927<br>9091e-119 | 2.1919026<br>6748459 | 0.6<br>17 | 0.2<br>57 | 4.861308094<br>84321e-115 | SMC1            |
| CST61         | 8.8083493289<br>7585e-129 | 2.2144791<br>6041439 | 0.4<br>79 | 0.1<br>47 | 1.277651070<br>16795e-124 | SMC1            |
| CLMP1         | 4.7904996378<br>0245e-141 | 2.2320398<br>1629443 | 0.4<br>08 | 0.0<br>93 | 6.948619724<br>63245e-137 | SMC1            |
| FAM180<br>A1  | 1.1648483631<br>0671e-121 | 2.2500923<br>4911445 | 0.3<br>82 | 0.0<br>94 | 1.689612550<br>68628e-117 | SMC1            |
| SUSD5<br>2    | 0                         | 2.2564782<br>4948509 | 0.8<br>94 | 0.2<br>85 | 0                         | SMC1            |
| ITGA11<br>2   | 1.3118616177<br>3042e-196 | 2.2957649<br>2225169 | 0.5<br>75 | 0.1<br>45 | 1.902855276<br>51798e-192 | SMC1            |
| SCG2          | 4.4220243571<br>9651e-61  | 2.3372512<br>0744711 | 0.1<br>63 | 0.0<br>32 | 6.414146330<br>11353e-57  | SMC1            |

|              |                           |                      |           |           |                           |      |
|--------------|---------------------------|----------------------|-----------|-----------|---------------------------|------|
| CYTL1        | 1.9937675710<br>3489e-82  | 2.3857570<br>2489652 | 0.3<br>58 | 0.1<br>17 | 2.891959861<br>78611e-78  | SMC1 |
| TPH11        | 1.1227351919<br>6226e-236 | 2.4074427<br>8255083 | 0.6<br>12 | 0.1<br>38 | 1.628527395<br>94126e-232 | SMC1 |
| WISP22       | 1.3471468359<br>8951e-189 | 2.4239022<br>3187437 | 0.5<br>96 | 0.1<br>68 | 1.954036485<br>60278e-185 | SMC1 |
| GALNT<br>5   | 3.5264102974<br>6383e-56  | 2.4382704<br>1316521 | 0.1<br>47 | 0.0<br>28 | 5.115058136<br>47128e-52  | SMC1 |
| WISP1        | 9.5073787538<br>7364e-39  | 2.4710652<br>4279143 | 0.1<br>11 | 0.0<br>23 | 1.379045288<br>24937e-34  | SMC1 |
| C5orf46<br>1 | 9.1393834512<br>2653e-163 | 2.5391098<br>7440216 | 0.4<br>54 | 0.1<br>03 | 1.325667569<br>60041e-158 | SMC1 |
| NOX41        | 1.2051739839<br>1974e-176 | 2.6103991<br>7275467 | 0.3<br>61 | 0.0<br>54 | 1.748104863<br>67558e-172 | SMC1 |
| ATRNL<br>11  | 2.5781049457<br>197e-135  | 2.7014623<br>3931088 | 0.2<br>83 | 0.0<br>43 | 3.739541223<br>76643e-131 | SMC1 |
| ROBO2        | 3.5525814757<br>8723e-84  | 2.7064883<br>0020445 | 0.1<br>62 | 0.0<br>21 | 5.153019430<br>62938e-80  | SMC1 |
| WSCD2        | 2.8304927272<br>4585e-61  | 2.8196550<br>655119  | 0.1<br>16 | 0.0<br>15 | 4.105629700<br>8701e-57   | SMC1 |
| MFAP5        | 1.4621391711<br>6715e-81  | 3.0318331<br>9051268 | 0.1<br>63 | 0.0<br>23 | 2.120832867<br>77795e-77  | SMC1 |
| RPRML        | 6.9475665521<br>4157e-82  | 3.6204511<br>9961335 | 0.1<br>21 | 0.0<br>1  | 1.007744528<br>38814e-77  | SMC1 |
| EDNRA        | 1.0419379505<br>2202e-71  | 2.0456635            | 0.2<br>4  | 0.0<br>54 | 1.511330997<br>23219e-67  | SMC2 |
| BTC1         | 3.5342168845<br>2668e-100 | 2.0600671<br>9843646 | 0.3<br>95 | 0.1<br>11 | 5.126381591<br>00595e-96  | SMC2 |
| ATP1A2<br>1  | 3.8903601145<br>4615e-75  | 2.0645897<br>6533605 | 0.2<br>93 | 0.0<br>77 | 5.642967346<br>14919e-71  | SMC2 |
| CASQ2<br>1   | 1.6692447779<br>2783e-42  | 2.0881261<br>1326528 | 0.1<br>46 | 0.0<br>33 | 2.421239550<br>38432e-38  | SMC2 |
| FZD3         | 3.4380665177<br>322e-29   | 2.0886604<br>8872002 | 0.1<br>05 | 0.0<br>25 | 4.986915483<br>97056e-25  | SMC2 |
| CKMT2<br>1   | 1.0038208809<br>0789e-72  | 2.0897272<br>9348947 | 0.2<br>87 | 0.0<br>78 | 1.456042187<br>7569e-68   | SMC2 |
| IL17B        | 5.8271684880<br>421e-35   | 2.0966874<br>6445404 | 0.1<br>4  | 0.0<br>37 | 8.452307891<br>90507e-31  | SMC2 |
| ASTN2        | 2.6902298373<br>1552e-36  | 2.1116423<br>3697616 | 0.1<br>09 | 0.0<br>22 | 3.902178379<br>02616e-32  | SMC2 |
| DES1         | 2.7292918775<br>7473e-56  | 2.1278134<br>6523277 | 0.2<br>33 | 0.0<br>63 | 3.958837868<br>42215e-52  | SMC2 |
| RYR21        | 1.2292362349<br>0861e-92  | 2.1314515<br>7649541 | 0.3<br>15 | 0.0<br>76 | 1.783007158<br>73494e-88  | SMC2 |

|                |                           |                      |           |           |                           |      |
|----------------|---------------------------|----------------------|-----------|-----------|---------------------------|------|
| ADRA2<br>C1    | 4.0158221668<br>0557e-96  | 2.1414733<br>4009869 | 0.3<br>6  | 0.0<br>94 | 5.824950052<br>95148e-92  | SMC2 |
| FNDC5          | 7.2369774864<br>3174e-30  | 2.1781968<br>8150413 | 0.1<br>06 | 0.0<br>25 | 1.049723584<br>40692e-25  | SMC2 |
| LINC00<br>8441 | 1.9778538647<br>7049e-37  | 2.1941981<br>5917753 | 0.1<br>58 | 0.0<br>43 | 2.868877030<br>8496e-33   | SMC2 |
| FAM181<br>B    | 6.4699487799<br>7748e-31  | 2.1966415<br>0739313 | 0.1<br>01 | 0.0<br>22 | 9.384660705<br>35733e-27  | SMC2 |
| REEP1<br>1     | 9.1749765560<br>0643e-58  | 2.2213369<br>1639541 | 0.1<br>88 | 0.0<br>42 | 1.330830349<br>44873e-53  | SMC2 |
| PART11         | 5.0906045590<br>8002e-73  | 2.2271679<br>5595515 | 0.2<br>61 | 0.0<br>64 | 7.383921912<br>94557e-69  | SMC2 |
| NUPR2<br>1     | 9.1948337983<br>4138e-44  | 2.2652625<br>9304517 | 0.1<br>62 | 0.0<br>4  | 1.333710642<br>44942e-39  | SMC2 |
| PTH1R          | 8.3028483199<br>1438e-39  | 2.2974680<br>6499517 | 0.1<br>25 | 0.0<br>27 | 1.204328148<br>80358e-34  | SMC2 |
| KCNA5<br>1     | 3.8661503543<br>9595e-106 | 2.3380111<br>7675425 | 0.3<br>35 | 0.0<br>76 | 5.607851089<br>05133e-102 | SMC2 |
| CSRP2<br>1     | 7.4741499462<br>9559e-287 | 2.3749557<br>5419911 | 0.8<br>89 | 0.2<br>91 | 1.084125449<br>71018e-282 | SMC2 |
| HRC            | 4.7328276364<br>394e-41   | 2.3815483<br>1518271 | 0.1<br>07 | 0.0<br>19 | 6.864966486<br>65535e-37  | SMC2 |
| TCAP1          | 5.2414799756<br>7574e-63  | 2.3934128<br>849897  | 0.1<br>97 | 0.0<br>42 | 7.602766704<br>71766e-59  | SMC2 |
| SLCO5<br>A1    | 1.8340198016<br>6835e-55  | 2.4241762<br>4614929 | 0.1<br>6  | 0.0<br>31 | 2.660245722<br>31995e-51  | SMC2 |
| PPP1R<br>1A1   | 1.5410572882<br>0548e-99  | 2.4622466<br>6559732 | 0.3<br>13 | 0.0<br>69 | 2.235303596<br>54205e-95  | SMC2 |
| PGAM2          | 1.3238787651<br>7862e-74  | 2.4702534<br>1279951 | 0.1<br>95 | 0.0<br>34 | 1.920286148<br>89159e-70  | SMC2 |
| SBSP0<br>N1    | 7.5427619985<br>661e-191  | 2.5936356<br>9272399 | 0.5<br>44 | 0.1<br>25 | 1.094077627<br>89201e-186 | SMC2 |
| ACTC1<br>1     | 8.7101247921<br>8868e-230 | 2.6661727<br>0162304 | 0.6<br>23 | 0.1<br>37 | 1.263403601<br>10697e-225 | SMC2 |
| SEMA3<br>E     | 1.0014035814<br>8296e-53  | 2.8128672<br>4355308 | 0.1<br>17 | 0.0<br>16 | 1.452535894<br>94103e-49  | SMC2 |
| RRAD           | 7.5545493870<br>1056e-284 | 2.8861283<br>5866749 | 0.7<br>31 | 0.1<br>71 | 1.095787388<br>58588e-279 | SMC2 |
| RERGL          | 0                         | 4.1492181<br>0187877 | 0.4<br>91 | 0.0<br>47 | 0                         | SMC2 |
| ANGPT<br>L1    | 6.1335657893<br>3672e-164 | 2.4344424<br>1175223 | 0.4<br>66 | 0.0<br>96 | 8.896737177<br>43292e-160 | SMC3 |
| DNAJB<br>5     | 1.2442908874<br>3964e-158 | 2.4352255<br>5674959 | 0.4<br>46 | 0.0<br>91 | 1.804843932<br>2312e-154  | SMC3 |

|                       |                           |                      |           |           |                           |      |
|-----------------------|---------------------------|----------------------|-----------|-----------|---------------------------|------|
| TNFRS<br>F12A         | 0                         | 2.4505995<br>0104782 | 0.9<br>84 | 0.4<br>08 | 0                         | SMC3 |
| FSTL3                 | 5.8132250589<br>2621e-293 | 2.4882341<br>8548985 | 0.8<br>05 | 0.2<br>03 | 8.432082947<br>97247e-289 | SMC3 |
| BAMBI                 | 5.7572643591<br>0903e-151 | 2.5103484<br>0437821 | 0.4<br>47 | 0.0<br>97 | 8.350911952<br>88765e-147 | SMC3 |
| CNN1                  | 0                         | 2.5153072<br>298573  | 1         | 0.3<br>66 | 0                         | SMC3 |
| SAMMS<br>ON           | 3.0815737062<br>6627e-119 | 2.5209681<br>2827468 | 0.2<br>92 | 0.0<br>48 | 4.469822660<br>93922e-115 | SMC3 |
| AC0187<br>42.1        | 1.5772142817<br>041e-96   | 2.5234618<br>2088364 | 0.3<br>06 | 0.0<br>68 | 2.287749315<br>61179e-92  | SMC3 |
| RAB23                 | 8.6584228095<br>8951e-240 | 2.5712115<br>6114124 | 0.6<br>56 | 0.1<br>48 | 1.255904228<br>53096e-235 | SMC3 |
| CREB5                 | 2.7584518588<br>3314e-237 | 2.6135775<br>6984231 | 0.7<br>16 | 0.1<br>95 | 4.001134421<br>23747e-233 | SMC3 |
| CNTN4                 | 7.2149315469<br>3505e-199 | 2.6207627<br>8085282 | 0.4<br>77 | 0.0<br>82 | 1.046525820<br>88293e-194 | SMC3 |
| SLMAP                 | 0                         | 2.6226299<br>0242994 | 0.9<br>31 | 0.3<br>24 | 0                         | SMC3 |
| AC0933<br>90.1        | 1.5071617303<br>0577e-142 | 2.6291109<br>9480054 | 0.3<br>5  | 0.0<br>58 | 2.186138089<br>80852e-138 | SMC3 |
| FHL5                  | 9.0211115116<br>2128e-261 | 2.6330173<br>539786  | 0.6<br>58 | 0.1<br>33 | 1.308512224<br>76067e-256 | SMC3 |
| FILIP1L               | 0                         | 2.6529200<br>1939599 | 0.9<br>99 | 0.5<br>67 | 0                         | SMC3 |
| LINC00<br>670         | 9.1196478084<br>6347e-100 | 2.7409856<br>8276635 | 0.2<br>38 | 0.0<br>38 | 1.322804914<br>61763e-95  | SMC3 |
| CASQ2                 | 1.8971103646<br>2917e-78  | 2.8126255<br>4300334 | 0.1<br>83 | 0.0<br>28 | 2.751758583<br>89462e-74  | SMC3 |
| CCDC1<br>44NL-<br>AS1 | 5.7607097917<br>3229e-58  | 2.8182627<br>7085102 | 0.1<br>58 | 0.0<br>28 | 8.355909552<br>90768e-54  | SMC3 |
| AC0272<br>37.3        | 1.9230571230<br>5526e-63  | 2.8457820<br>6268491 | 0.1<br>42 | 0.0<br>2  | 2.789394356<br>99165e-59  | SMC3 |
| MBNL1-<br>AS1         | 2.8969735778<br>8605e-246 | 2.8467277<br>8541886 | 0.7<br>88 | 0.2<br>4  | 4.202060174<br>72372e-242 | SMC3 |
| RBP4                  | 8.5287598561<br>9022e-47  | 2.8467559<br>0398354 | 0.1<br>35 | 0.0<br>26 | 1.237096617<br>14039e-42  | SMC3 |
| DES                   | 1.9303505618<br>9003e-130 | 2.9152747<br>2074573 | 0.3<br>15 | 0.0<br>52 | 2.799973490<br>02149e-126 | SMC3 |
| BAG2                  | 0                         | 2.9312279<br>1440894 | 0.8<br>72 | 0.2<br>37 | 0                         | SMC3 |

|                 |                           |                      |           |           |                           |      |
|-----------------|---------------------------|----------------------|-----------|-----------|---------------------------|------|
| ACTG2           | 0                         | 2.9440305<br>6115415 | 0.8<br>46 | 0.2<br>09 | 0                         | SMC3 |
| AL1360<br>84.3  | 3.3085698226<br>5117e-79  | 3.0879141<br>9290168 | 0.1<br>66 | 0.0<br>22 | 4.799080527<br>75552e-75  | SMC3 |
| MYRFL           | 3.4267646315<br>5514e-130 | 3.1020578<br>0813949 | 0.2<br>88 | 0.0<br>43 | 4.970522098<br>07073e-126 | SMC3 |
| NPY1R           | 9.0021349168<br>937e-115  | 3.2103560<br>1990396 | 0.2<br>56 | 0.0<br>38 | 1.305759669<br>69543e-110 | SMC3 |
| BDNF            | 1.1548525754<br>7196e-145 | 3.2694668<br>4090617 | 0.2<br>6  | 0.0<br>28 | 1.675113660<br>72208e-141 | SMC3 |
| MYOZ2           | 0                         | 3.6726712<br>511603  | 0.6<br>06 | 0.0<br>78 | 0                         | SMC3 |
| IL31RA          | 4.4049134992<br>7932e-95  | 3.8812489<br>3381047 | 0.1<br>52 | 0.0<br>13 | 6.389327030<br>70465e-91  | SMC3 |
| FOXJ3           | 0.0044527768<br>8138881   | 1.5735959<br>5766677 | 0.0<br>45 | 0.1<br>91 | 1                         | SMC4 |
| BAG4            | 0.0042923464<br>2753194   | 1.5770985<br>8026536 | 0.0<br>15 | 0.1<br>38 | 1                         | SMC4 |
| PBX13           | 0.0021606345<br>3568978   | 1.5800452<br>3419933 | 0.0<br>6  | 0.2<br>35 | 1                         | SMC4 |
| THUMP<br>D3-AS1 | 0.0071225208<br>7933577   | 1.5810026<br>0113402 | 0.0<br>9  | 0.2<br>59 | 1                         | SMC4 |
| CSNK1<br>G3     | 0.0088397285<br>474483    | 1.5894077<br>4874776 | 0.0<br>6  | 0.2<br>01 | 1                         | SMC4 |
| HIP11           | 0.0093166377<br>7613375   | 1.5922976<br>3144931 | 0.0<br>9  | 0.2<br>52 | 1                         | SMC4 |
| SFPQ            | 0.0002878418<br>79951389  | 1.5999389<br>3061759 | 0.2<br>24 | 0.6<br>04 | 1                         | SMC4 |
| NFATC<br>3      | 0.0083354113<br>4439388   | 1.6085888<br>1913488 | 0.0<br>45 | 0.1<br>77 | 1                         | SMC4 |
| CDC42<br>SE1    | 0.0078811605<br>7999578   | 1.6156946            | 0.1<br>34 | 0.3<br>37 | 1                         | SMC4 |
| MAP1B<br>3      | 8.6136331358<br>2701e-06  | 1.6212452<br>940981  | 0.6<br>72 | 0.5<br>56 | 0.124940748<br>635171     | SMC4 |
| KANSL<br>1      | 0.0071036694<br>9437714   | 1.6222457<br>5835061 | 0.1<br>64 | 0.3<br>96 | 1                         | SMC4 |
| CDS23           | 0.0031520881<br>3032572   | 1.6478617<br>1081561 | 0.1<br>04 | 0.3<br>02 | 1                         | SMC4 |
| KIF1B3          | 0.0099762732<br>8425184   | 1.6539421<br>7212695 | 0.1<br>19 | 0.3<br>04 | 1                         | SMC4 |
| AHI11           | 0.0012067467<br>1007892   | 1.6548843<br>4624815 | 0.1<br>34 | 0.3<br>81 | 1                         | SMC4 |
| DLGAP<br>43     | 0.0051413080<br>548359    | 1.6758839<br>0950198 | 0.1<br>34 | 0.3<br>45 | 1                         | SMC4 |

|               |                          |                      |           |           |                           |      |
|---------------|--------------------------|----------------------|-----------|-----------|---------------------------|------|
| HIBCH2        | 0.0021021356<br>6369138  | 1.6959418<br>4760688 | 0.0<br>75 | 0.2<br>63 | 1                         | SMC4 |
| TMEM3<br>3    | 0.0050892389<br>5692217  | 1.7023754<br>0096423 | 0.0<br>45 | 0.1<br>88 | 1                         | SMC4 |
| NFAT5         | 0.0024372679<br>2151901  | 1.7239890<br>3408574 | 0.1<br>04 | 0.3<br>14 | 1                         | SMC4 |
| PRRC2<br>C1   | 0.0058561980<br>3081045  | 1.7327860<br>624204  | 0.3<br>43 | 0.7<br>81 | 1                         | SMC4 |
| USP531        | 0.0074436183<br>2879514  | 1.7355959<br>371687  | 0.2<br>09 | 0.4<br>67 | 1                         | SMC4 |
| PREX1         | 0.0058561325<br>9587706  | 1.7608533<br>3011056 | 0.1<br>04 | 0.2<br>91 | 1                         | SMC4 |
| INSR3         | 0.0054449882<br>9933662  | 1.7983668<br>7266793 | 0.0<br>75 | 0.2<br>39 | 1                         | SMC4 |
| KCTD9<br>3    | 0.0074455502<br>3186896  | 1.8089776<br>4040517 | 0.0<br>6  | 0.2<br>05 | 1                         | SMC4 |
| TMTC1<br>2    | 0.0085554124<br>9687054  | 1.8284232<br>647137  | 0.0<br>45 | 0.1<br>76 | 1                         | SMC4 |
| RNF411        | 0.0030613650<br>2583734  | 1.9104466<br>4689778 | 0.0<br>6  | 0.2<br>27 | 1                         | SMC4 |
| SYNPO<br>23   | 0.0040269858<br>1642929  | 2.0450990<br>8802481 | 0.4<br>33 | 0.3<br>98 | 1                         | SMC4 |
| NDUFA<br>4L22 | 0.0059738995<br>0551369  | 2.4890572<br>2642546 | 0.3<br>13 | 0.2<br>2  | 1                         | SMC4 |
| LMO7-<br>AS1  | 0.0014823898<br>9310585  | 3.2349542<br>0318281 | 0.1<br>04 | 0.0<br>35 | 1                         | SMC4 |
| GRIA23        | 0.0037256361<br>51692    | 3.2748852<br>8669919 | 0.2<br>99 | 0.2<br>12 | 1                         | SMC4 |
| ADAM3<br>33   | 0.0001387831<br>65721019 | 4.1861018<br>2202294 | 0.1<br>64 | 0.0<br>61 | 1                         | SMC4 |
| SIX12         | 6.8067199336<br>4793e-39 | 3.2538221<br>457649  | 0.1<br>48 | 0.0<br>2  | 9.873147263<br>75632e-35  | SMC5 |
| SNAI2         | 1.5497651464<br>0611e-37 | 3.3039222<br>8553995 | 0.1<br>26 | 0.0<br>15 | 2.247934344<br>86206e-33  | SMC5 |
| TSPAN<br>132  | 4.2277112344<br>2487e-66 | 3.3069179<br>2623482 | 0.1<br>62 | 0.0<br>14 | 6.132295145<br>53327e-62  | SMC5 |
| C2orf40<br>2  | 4.0979959536<br>339e-192 | 3.3894736<br>9321587 | 0.9<br>49 | 0.2<br>59 | 5.944143130<br>74597e-188 | SMC5 |
| DLX2          | 2.7666493560<br>3656e-51 | 3.4494741<br>1976613 | 0.1<br>73 | 0.0<br>21 | 4.013024890<br>93103e-47  | SMC5 |
| AMPH          | 7.2990020568<br>4284e-30 | 3.5272227<br>4459115 | 0.1<br>16 | 0.0<br>16 | 1.058720248<br>34505e-25  | SMC5 |
| MSX2          | 4.6774925077<br>6883e-67 | 3.5278235<br>0415939 | 0.2<br>09 | 0.0<br>23 | 6.784702882<br>51869e-63  | SMC5 |

|                |                           |                      |           |           |                           |      |
|----------------|---------------------------|----------------------|-----------|-----------|---------------------------|------|
| THSD4<br>4     | 1.5892603409<br>2824e-153 | 3.5664558<br>2617434 | 0.7<br>04 | 0.1<br>52 | 2.305222124<br>51641e-149 | SMC5 |
| SLC16A<br>9    | 3.5372358384<br>7407e-56  | 3.6457247<br>2526811 | 0.1<br>59 | 0.0<br>16 | 5.130760583<br>70664e-52  | SMC5 |
| GPC31          | 3.0286468365<br>858e-97   | 3.6573254<br>2507087 | 0.3<br>68 | 0.0<br>53 | 4.393052236<br>4677e-93   | SMC5 |
| BARX1          | 8.2898164655<br>8115e-33  | 3.6864336<br>4651746 | 0.1<br>05 | 0.0<br>12 | 1.202437878<br>33255e-28  | SMC5 |
| RGS7B<br>P3    | 6.0122556726<br>0738e-124 | 3.7740009<br>1509828 | 0.3<br>86 | 0.0<br>45 | 8.720776853<br>117e-120   | SMC5 |
| EXPH5          | 9.6756906693<br>3331e-65  | 3.8916020<br>8225146 | 0.1<br>55 | 0.0<br>12 | 1.403458931<br>5868e-60   | SMC5 |
| GDF101         | 4.6411485025<br>241e-101  | 4.0721089<br>3221034 | 0.2<br>78 | 0.0<br>27 | 6.731985902<br>9112e-97   | SMC5 |
| SAMD1<br>12    | 1.6894087418<br>7179e-202 | 4.2937961<br>314679  | 0.4<br>66 | 0.0<br>38 | 2.450487380<br>08503e-198 | SMC5 |
| INSC           | 1.5167341332<br>1502e-51  | 4.3825992<br>336998  | 0.1<br>01 | 0.0<br>06 | 2.200022860<br>22839e-47  | SMC5 |
| SOST3          | 1.7035672722<br>8347e-214 | 4.4421696<br>3252241 | 0.7<br>47 | 0.1<br>18 | 2.471024328<br>44717e-210 | SMC5 |
| PAMR1<br>1     | 8.2887937640<br>569e-99   | 4.6570227<br>1108223 | 0.1<br>81 | 0.0<br>1  | 1.202289535<br>47645e-94  | SMC5 |
| PAX9           | 4.8730903074<br>8297e-69  | 4.7554062<br>0254097 | 0.1<br>05 | 0.0<br>04 | 7.068417491<br>00405e-65  | SMC5 |
| CPNE4          | 7.8241116317<br>2576e-198 | 5.1504770<br>9797779 | 0.2<br>85 | 0.0<br>1  | 1.134887392<br>18182e-193 | SMC5 |
| PTN2           | 5.5898507087<br>4375e-232 | 5.2278279<br>3891499 | 0.7<br>22 | 0.0<br>98 | 8.108078453<br>03281e-228 | SMC5 |
| AC0120<br>85.2 | 4.7869093933<br>2489e-81  | 5.2339687<br>2882108 | 0.1<br>23 | 0.0<br>05 | 6.943412075<br>01775e-77  | SMC5 |
| LINC02<br>5441 | 0                         | 5.8053885<br>395896  | 0.4<br>69 | 0.0<br>13 | 0                         | SMC5 |
| SUCNR<br>12    | 0                         | 6.1060384<br>6420948 | 0.6<br>57 | 0.0<br>39 | 0                         | SMC5 |
| DLX3           | 1.1748604216<br>7486e-124 | 6.1229625<br>6432619 | 0.1<br>52 | 0.0<br>04 | 1.704135041<br>63938e-120 | SMC5 |
| DLX51          | 0                         | 6.1894430<br>918815  | 0.7<br>11 | 0.0<br>2  | 0                         | SMC5 |
| PHYHIP<br>L    | 1.8110423919<br>0096e-277 | 6.3099133<br>5272054 | 0.3       | 0.0<br>05 | 2.626916989<br>45234e-273 | SMC5 |
| DLX6           | 0                         | 6.4140223<br>041228  | 0.4<br>44 | 0.0<br>07 | 0                         | SMC5 |
| RSPO2          | 0                         | 7.7443192<br>1348185 | 0.3<br>72 | 0.0<br>04 | 0                         | SMC5 |

|             |                           |                      |           |           |                           |        |
|-------------|---------------------------|----------------------|-----------|-----------|---------------------------|--------|
| DLX6-AS1    | 0                         | 8.1201215<br>5649984 | 0.6<br>39 | 0.0<br>11 | 0                         | SMC5   |
| CD6         | 0                         | 7.3831619<br>5066213 | 0.3<br>64 | 0.0<br>08 | 0                         | T cell |
| SH2D2<br>A  | 3.1887514948<br>0312e-191 | 7.4500797<br>6162495 | 0.1<br>91 | 0.0<br>03 | 4.625284043<br>21193e-187 | T cell |
| CAMK4       | 5.2381171755<br>0285e-193 | 7.5144985<br>389235  | 0.1<br>88 | 0.0<br>02 | 7.597888963<br>06689e-189 | T cell |
| GATA3       | 5.2938540181<br>5022e-210 | 7.5702761<br>4406704 | 0.2<br>13 | 0.0<br>03 | 7.678735253<br>3269e-206  | T cell |
| SLA21       | 3.7626030923<br>4263e-223 | 7.7789730<br>5231318 | 0.2<br>1  | 0.0<br>02 | 5.457655785<br>44299e-219 | T cell |
| PYHIN1      | 2.0160707877<br>7964e-252 | 7.8065243<br>2842603 | 0.2<br>48 | 0.0<br>03 | 2.924310677<br>67437e-248 | T cell |
| SLFN12<br>L | 1.7959318465<br>0802e-247 | 8.0940238<br>2276011 | 0.2<br>32 | 0.0<br>02 | 2.604999143<br>35988e-243 | T cell |
| CXCR3<br>1  | 0                         | 8.1823343<br>566874  | 0.3<br>76 | 0.0<br>03 | 0                         | T cell |
| SPOCK<br>2  | 0                         | 8.1855008<br>6327669 | 0.5<br>14 | 0.0<br>04 | 0                         | T cell |
| CD961       | 0                         | 8.2006673<br>6678452 | 0.4<br>58 | 0.0<br>04 | 0                         | T cell |
| CCL5        | 0                         | 8.2782953<br>9202404 | 0.8<br>71 | 0.0<br>22 | 0                         | T cell |
| SAMD3       | 0                         | 8.3326444<br>4266435 | 0.4<br>08 | 0.0<br>05 | 0                         | T cell |
| TRAC        | 0                         | 8.6674028<br>1143965 | 0.7<br>65 | 0.0<br>09 | 0                         | T cell |
| BCL11B      | 0                         | 8.6731281<br>7486012 | 0.3<br>2  | 0.0<br>02 | 0                         | T cell |
| CD2         | 0                         | 8.6798049<br>4549554 | 0.8<br>75 | 0.0<br>11 | 0                         | T cell |
| CD247       | 0                         | 8.9067510<br>3229102 | 0.4<br>98 | 0.0<br>03 | 0                         | T cell |
| CD3E        | 0                         | 8.9326370<br>8926524 | 0.7<br>9  | 0.0<br>04 | 0                         | T cell |
| TRBC2       | 0                         | 8.9689883<br>6037894 | 0.7<br>49 | 0.0<br>04 | 0                         | T cell |
| GZMM        | 0                         | 9.2912612<br>9796331 | 0.7<br>37 | 0.0<br>04 | 0                         | T cell |
| NKG7        | 0                         | 9.3630649<br>6483264 | 0.6<br>77 | 0.0<br>09 | 0                         | T cell |
| LCK         | 0                         | 9.4998829<br>5442428 | 0.6<br>87 | 0.0<br>03 | 0                         | T cell |

|               |   |                      |           |           |   |        |
|---------------|---|----------------------|-----------|-----------|---|--------|
| TRBC1         | 0 | 9.5274177<br>0750258 | 0.5<br>96 | 0.0<br>03 | 0 | T cell |
| CD3D          | 0 | 9.5587008<br>1270272 | 0.8<br>9  | 0.0<br>05 | 0 | T cell |
| CD8A          | 0 | 9.6162635<br>7644487 | 0.4<br>67 | 0.0<br>02 | 0 | T cell |
| LINC01<br>871 | 0 | 9.6585477<br>7987009 | 0.4<br>11 | 0.0<br>02 | 0 | T cell |
| GZMH          | 0 | 9.7113896<br>6218851 | 0.4<br>98 | 0.0<br>02 | 0 | T cell |
| CD3G          | 0 | 9.8950291<br>8458844 | 0.7<br>77 | 0.0<br>02 | 0 | T cell |
| GZMK          | 0 | 9.9733007<br>9904193 | 0.7<br>12 | 0.0<br>04 | 0 | T cell |
| GZMA          | 0 | 10.088617<br>8316234 | 0.8<br>59 | 0.0<br>04 | 0 | T cell |
| KLRB1         | 0 | 10.218068<br>7125084 | 0.2<br>73 | 0.0<br>01 | 0 | T cell |

**Supplementary Table S4.** Drug prediction based on LCDEGs.

| <b>Search term</b> | <b>Match type</b> | <b>Gene</b> | <b>Drug</b>                 | <b>Interaction_types</b> |
|--------------------|-------------------|-------------|-----------------------------|--------------------------|
| CYBB               | Definite          | CYBB        | CHRYSIN                     |                          |
| CYBB               | Definite          | CYBB        | APIGENIN                    |                          |
| CYBB               | Definite          | CYBB        | LUTEOLIN                    |                          |
| CASP1              | Definite          | CASP<br>1   | NIVOCASAN                   | inhibitor                |
| CASP1              | Definite          | CASP<br>1   | EMRICASAN                   | inhibitor                |
| CASP1              | Definite          | CASP<br>1   | PRALNACASAN                 | inhibitor                |
| CASP1              | Definite          | CASP<br>1   | BERKELEYAMID<br>E C         |                          |
| CASP1              | Definite          | CASP<br>1   | CHEMBL337173                |                          |
| CASP1              | Definite          | CASP<br>1   | 4-CHLOROMERCURIBENZOIC ACID |                          |
| CASP1              | Definite          | CASP<br>1   | BERKELEYDION<br>E           |                          |
| CASP1              | Definite          | CASP<br>1   | GOSSYPOL                    |                          |
| CASP1              | Definite          | CASP<br>1   | MESALAMINE                  |                          |
| CASP1              | Definite          | CASP<br>1   | BERKELEYACET<br>AL A        |                          |
| CASP1              | Definite          | CASP<br>1   | DIACEREIN                   |                          |
| CASP1              | Definite          | CASP<br>1   | VERMISTATIN                 |                          |
| CASP1              | Definite          | CASP<br>1   | BERKELEYACET<br>AL B        |                          |
| CASP1              | Definite          | CASP<br>1   | BELNACASAN                  |                          |
| CASP1              | Definite          | CASP<br>1   | CHEMBL578512                |                          |
| CASP1              | Definite          | CASP<br>1   | CHEMBL429095                |                          |
| CASP1              | Definite          | CASP<br>1   | JUGLONE                     |                          |

|       |          |           |                           |                           |
|-------|----------|-----------|---------------------------|---------------------------|
| CASP1 | Definite | CASP<br>1 | ISOBOLDINE                |                           |
| CASP1 | Definite | CASP<br>1 | CHEMBL415893              |                           |
| CASP1 | Definite | CASP<br>1 | BERKELEYAMID<br>E B       |                           |
| CASP1 | Definite | CASP<br>1 | BERKELEYACET<br>AL C      |                           |
| CASP1 | Definite | CASP<br>1 | CHEMBL580421              |                           |
| CASP1 | Definite | CASP<br>1 | BERKELEYTRION<br>E        |                           |
| IL1B  | Definite | IL1B      | RILONACEPT                | inhibitor binder          |
| IL1B  | Definite | IL1B      | CANAKINUMAB               | antibody binder inhibitor |
| IL1B  | Definite | IL1B      | MELATONIN                 |                           |
| IL1B  | Definite | IL1B      | VERAPAMIL                 |                           |
| IL1B  | Definite | IL1B      | TILUDRONIC<br>ACID        |                           |
| IL1B  | Definite | IL1B      | HYDROQUINONE              |                           |
| IL1B  | Definite | IL1B      | PENTOXIFYLLIN<br>E        |                           |
| IL1B  | Definite | IL1B      | CLODRONIC<br>ACID         |                           |
| IL1B  | Definite | IL1B      | MAFOSFAMIDE               |                           |
| IL1B  | Definite | IL1B      | DIACEREIN                 |                           |
| IL1B  | Definite | IL1B      | LANSOPRAZOLE              |                           |
| IL1B  | Definite | IL1B      | INFLIXIMAB                |                           |
| IL1B  | Definite | IL1B      | ASPIRIN                   |                           |
| IL1B  | Definite | IL1B      | USTEKINUMAB               |                           |
| IL1B  | Definite | IL1B      | RISEDRONIC<br>ACID        |                           |
| IL1B  | Definite | IL1B      | CELASTROL                 |                           |
| IL1B  | Definite | IL1B      | HYDROCORTISO<br>NE        |                           |
| IL1B  | Definite | IL1B      | GLUCOSAMINE               |                           |
| IL1B  | Definite | IL1B      | MORPHINE                  |                           |
| IL1B  | Definite | IL1B      | RALOXIFENE                |                           |
| IL1B  | Definite | IL1B      | GEVOKIZUMAB               |                           |
| IL1B  | Definite | IL1B      | RESVERATROL               |                           |
| IL1B  | Definite | IL1B      | TT-301                    |                           |
| IL1B  | Definite | IL1B      | ECHINACEA,<br>UNSPECIFIED |                           |

|       |          |           |                                  |                    |
|-------|----------|-----------|----------------------------------|--------------------|
| IL1B  | Definite | IL1B      | NICARDIPINE                      |                    |
| IL1B  | Definite | IL1B      | LITHIUM                          |                    |
| IL1B  | Definite | IL1B      | PENTAMIDINE                      |                    |
| IL1B  | Definite | IL1B      | ACITRETIN                        |                    |
| IL1B  | Definite | IL1B      | IBUDILAST                        |                    |
| IL1B  | Definite | IL1B      | PRAVASTATIN                      |                    |
| IL1B  | Definite | IL1B      | ERYTHROMYCIN                     |                    |
| IL1B  | Definite | IL1B      | OMEPRazole                       |                    |
| IL1B  | Definite | IL1B      | ALTEPLASE                        |                    |
| IL1B  | Definite | IL1B      | CEFAclOR                         |                    |
| IL1B  | Definite | IL1B      | THYROGLOBULI<br>N                |                    |
| IL1B  | Definite | IL1B      | RABEPRAZOLE                      |                    |
| IL1B  | Definite | IL1B      | OFLOXACIN                        |                    |
| HMOX1 | Definite | HMOX<br>1 | SORAFENIB                        |                    |
| HMOX1 | Definite | HMOX<br>1 | SUNITINIB                        |                    |
| HMOX1 | Definite | HMOX<br>1 | STANNSOPORFI<br>N                |                    |
| HMOX1 | Definite | HMOX<br>1 | ASPIRIN                          |                    |
| DPP4  | Definite | DPP4      | OMARIGLIPTIN                     | inhibitor          |
| DPP4  | Definite | DPP4      | LINAGLIPTIN                      | inhibitor          |
| DPP4  | Definite | DPP4      | BEGELOMAB                        | inhibitor antibody |
| DPP4  | Definite | DPP4      | SAXAGLIPTIN                      | inhibitor          |
| DPP4  | Definite | DPP4      | VILDAGLIPTIN                     | inhibitor          |
| DPP4  | Definite | DPP4      | ALOGLIPTIN                       | inhibitor          |
| DPP4  | Definite | DPP4      | SITAGLIPTIN<br>PHOSPHATE         | inhibitor          |
| DPP4  | Definite | DPP4      | GOSOGLIPTIN                      | inhibitor          |
| DPP4  | Definite | DPP4      | CARMEGLIPTIN                     | inhibitor          |
| DPP4  | Definite | DPP4      | SITAGLIPTIN                      | inhibitor          |
| DPP4  | Definite | DPP4      | SAXAGLIPTIN<br>HYDROCHLORID<br>E | inhibitor          |
| DPP4  | Definite | DPP4      | TRELAGLIPTIN<br>SUCCINATE        | inhibitor          |
| DPP4  | Definite | DPP4      | TENELIGLIPTIN                    | inhibitor          |
| DPP4  | Definite | DPP4      | ALOGLIPTIN<br>BENZOATE           | inhibitor          |
| DPP4  | Definite | DPP4      | GEMIGLIPTIN                      |                    |
| DPP4  | Definite | DPP4      | DUTOGLIPTIN                      |                    |

|       |          |           |                              |          |
|-------|----------|-----------|------------------------------|----------|
| DPP4  | Definite | DPP4      | BISEGLIPTIN                  |          |
| DPP4  | Definite | DPP4      | VALACYCLOVIR                 |          |
| DPP4  | Definite | DPP4      | EVOGLIPTIN                   |          |
| DPP4  | Definite | DPP4      | ENALAPRIL                    |          |
| DPP4  | Definite | DPP4      | DENAGLIPTIN                  |          |
| DPP4  | Definite | DPP4      | ANAGLIPTIN                   |          |
| DPP4  | Definite | DPP4      | TRELAGLIPTIN                 |          |
| DPP4  | Definite | DPP4      | CAPTOPRIL                    |          |
| PTPN6 | Definite | PTPN<br>6 | TOFACITINIB                  |          |
| PTPN6 | Definite | PTPN<br>6 | CHEMBL510966                 |          |
| PTPN6 | Definite | PTPN<br>6 | CHEMBL472004                 |          |
| PTPN6 | Definite | PTPN<br>6 | SORAFENIB                    |          |
| TLR2  | Definite | TLR2      | TOMARALIMAB                  | antibody |
| TLR2  | Definite | TLR2      | DIAPEP-277                   |          |
| TLR2  | Definite | TLR2      | CHEMBL1836411                |          |
| TLR2  | Definite | TLR2      | RESVERATROL<br>HEXANOIC ACID |          |
